# Supplementary material for: Cytotoxic isovaleryl sucrose esters from Ainsliaea yunnanensis: reduction of mitochondrial membrane potential and increase of reactive oxygen species levels in A549 cells
Source: Royal Society of Chemistry journal article supplement (doi:10.1039/c7ra01986f), 2017-01-01
Supplement: c7ra01986f1.pdf [file c7ra01986f1.pdf]

## *Supporting Information*

### **Cytotoxic isovaleryl sucrose esters from *Ainsliaea yunnanensis*: reduction of MMP and increment of ROS levels in A549 cells**

Xin Fang<sup>a, b</sup>, Zhi-Guo Zhuo<sup>a</sup>, Xi-Ke Xu<sup>a</sup>, Ji Ye<sup>a</sup>, Hui-Liang Li<sup>a</sup>, Yun-Heng Shen<sup>a, \*</sup>,  
and Wei-Dong Zhang<sup>a, b, c, \*</sup>

<sup>a</sup> Department of Phytochemistry, Second Military Medical University, Shanghai 200433, P. R. China

<sup>b</sup> Shanghai University of Traditional Chinese Medicine, Shanghai 201203, P. R. China

<sup>c</sup> Shanghai Institute of Pharmaceutical Industry, Shanghai 201203, P. R. China

\*E-mail: shenyunheng@hotmail.com (Y. H. Shen); wdzhangy@hotmail.com (W. D. Zhang), Tel: +86-21-81871244.

## *Contents*

- Figure S1.** HRESIMS spectrum of compound **1**
- Figure S2.** IR spectrum of compound **1**
- Figure S3.**  $^1\text{H}$  NMR spectrum of compound **1** (500 MHz,  $\text{CDCl}_3$ )
- Figure S4.**  $^{13}\text{C}$  NMR spectrum of compound **1** (125 MHz,  $\text{CDCl}_3$ )
- Figure S5.** DEPT NMR spectrum of compound **1** (125 MHz,  $\text{CDCl}_3$ )
- Figure S6.**  $^1\text{H}$ - $^1\text{H}$  COSY NMR spectrum of compound **1** (500 MHz,  $\text{CDCl}_3$ )
- Figure S7.** HSQC NMR spectrum of compound **1** (500 MHz,  $\text{CDCl}_3$ )
- Figure S8.** HMBC NMR spectrum of compound **1** (500 MHz,  $\text{CDCl}_3$ )
- Figure S9.** The magnified HMBC NMR spectrum of compound **1** (500 MHz,  $\text{CDCl}_3$ )
- Figure S10.** NOESY NMR spectrum of compound **1** (500 MHz,  $\text{CDCl}_3$ )
- Figure S11.** HRESIMS spectrum of compound **2**
- Figure S12.** IR spectrum of compound **2**
- Figure S13.**  $^1\text{H}$  NMR spectrum of compound **2** (500 MHz,  $\text{CDCl}_3$ )
- Figure S14.**  $^{13}\text{C}$  NMR spectrum of compound **2** (125 MHz,  $\text{CDCl}_3$ )
- Figure S15.** DEPT NMR spectrum of compound **2** (125 MHz,  $\text{CDCl}_3$ )
- Figure S16.**  $^1\text{H}$ - $^1\text{H}$  COSY NMR spectrum of compound **2** (500 MHz,  $\text{CDCl}_3$ )
- Figure S17.** HSQC NMR spectrum of compound **2** (500 MHz,  $\text{CDCl}_3$ )
- Figure S18.** HMBC NMR spectrum of compound **2** (500 MHz,  $\text{CDCl}_3$ )
- Figure S19.** The magnified HMBC NMR spectrum of compound **2** (500 MHz,  $\text{CDCl}_3$ )
- Figure S20.** NOESY NMR spectrum of compound **2** (500 MHz,  $\text{CDCl}_3$ )
- Figure S21.** HRESIMS spectrum of compound **3**
- Figure S22.** IR spectrum of compound **3**
- Figure S23.**  $^1\text{H}$  NMR spectrum of compound **3** (500 MHz,  $\text{CDCl}_3$ )
- Figure S24.**  $^{13}\text{C}$  NMR spectrum of compound **3** (125 MHz,  $\text{CDCl}_3$ )
- Figure S25.** DEPT NMR spectrum of compound **3** (125 MHz,  $\text{CDCl}_3$ )
- Figure S26.**  $^1\text{H}$ - $^1\text{H}$  COSY NMR spectrum of compound **3** (500 MHz,  $\text{CDCl}_3$ )
- Figure S27.** HSQC NMR spectrum of compound **3** (500 MHz,  $\text{CDCl}_3$ )
- Figure S28.** HMBC NMR spectrum of compound **3** (500 MHz,  $\text{CDCl}_3$ )
- Figure S29.** The magnified HMBC NMR spectrum of compound **3** (500 MHz,  $\text{CDCl}_3$ )
- Figure S30.** NOESY NMR spectrum of compound **3** (500 MHz,  $\text{CDCl}_3$ )

**Figure S31.** HRESIMS spectrum of compound **4**

**Figure S32.** IR spectrum of compound **4**

**Figure S33.**  $^1\text{H}$  NMR spectrum of compound **4** (500 MHz,  $\text{CDCl}_3$ )

**Figure S34.**  $^{13}\text{C}$  NMR spectrum of compound **4** (125 MHz,  $\text{CDCl}_3$ )

**Figure S35.** DEPT NMR spectrum of compound **4** (125 MHz,  $\text{CDCl}_3$ )

**Figure S36.**  $^1\text{H}$ - $^1\text{H}$  COSY NMR spectrum of compound **4** (500 MHz,  $\text{CDCl}_3$ )

**Figure S37.** HSQC NMR spectrum of compound **4** (500 MHz,  $\text{CDCl}_3$ )

**Figure S38.** HMBC NMR spectrum of compound **4** (500 MHz,  $\text{CDCl}_3$ )

**Figure S39.** The magnified HMBC NMR spectrum of compound **4** (500 MHz,  $\text{CDCl}_3$ )

**Figure S40.** NOESY NMR spectrum of compound **4** (500 MHz,  $\text{CDCl}_3$ )

**Figure S41.** HRESIMS spectrum of compound **5**

**Figure S42.** IR spectrum of compound **5**

**Figure S43.**  $^1\text{H}$  NMR spectrum of compound **5** (500 MHz,  $\text{CDCl}_3$ )

**Figure S44.**  $^{13}\text{C}$  NMR spectrum of compound **5** (125 MHz,  $\text{CDCl}_3$ )

**Figure S45.** DEPT NMR spectrum of compound **5** (125 MHz,  $\text{CDCl}_3$ )

**Figure S46.**  $^1\text{H}$ - $^1\text{H}$  COSY NMR spectrum of compound **5** (500 MHz,  $\text{CDCl}_3$ )

**Figure S47.** HSQC NMR spectrum of compound **5** (500 MHz,  $\text{CDCl}_3$ )

**Figure S48.** HMBC NMR spectrum of compound **5** (500 MHz,  $\text{CDCl}_3$ )

**Figure S49.** The magnified HMBC NMR spectrum of compound **5** (500 MHz,  $\text{CDCl}_3$ )

**Figure S50.** NOESY NMR spectrum of compound **5** (500 MHz,  $\text{CDCl}_3$ )

**Figure S51.** HRESIMS spectrum of compound **6**

**Figure S52.** IR spectrum of compound **6**

**Figure S53.**  $^1\text{H}$  NMR spectrum of compound **6** (500 MHz,  $\text{CDCl}_3$ )

**Figure S54.**  $^{13}\text{C}$  NMR spectrum of compound **6** (125 MHz,  $\text{CDCl}_3$ )

**Figure S55.** DEPT NMR spectrum of compound **6** (125 MHz,  $\text{CDCl}_3$ )

**Figure S56.**  $^1\text{H}$ - $^1\text{H}$  COSY NMR spectrum of compound **6** (500 MHz,  $\text{CDCl}_3$ )

**Figure S57.** HSQC NMR spectrum of compound **6** (500 MHz,  $\text{CDCl}_3$ )

**Figure S58.** HMBC NMR spectrum of compound **6** (500 MHz,  $\text{CDCl}_3$ )

**Figure S59.** The magnified HMBC NMR spectrum of compound **6** (500 MHz,  $\text{CDCl}_3$ )

**Figure S60.** NOESY NMR spectrum of compound **6** (500 MHz,  $\text{CDCl}_3$ )

**Figure S61.** HRESIMS spectrum of compound **7**

**Figure S62.** IR spectrum of compound **7**

**Figure S63.**  $^1\text{H}$  NMR spectrum of compound **7** (500 MHz,  $\text{CDCl}_3$ )

**Figure S64.**  $^{13}\text{C}$  NMR spectrum of compound **7** (125 MHz,  $\text{CDCl}_3$ )

**Figure S65.** DEPT NMR spectrum of compound **7** (125 MHz,  $\text{CDCl}_3$ )

**Figure S66.**  $^1\text{H}$ - $^1\text{H}$  COSY NMR spectrum of compound **7** (500 MHz,  $\text{CDCl}_3$ )

**Figure S67.** HSQC NMR spectrum of compound **7** (500 MHz,  $\text{CDCl}_3$ )

**Figure S68.** HMBC NMR spectrum of compound **7** (500 MHz,  $\text{CDCl}_3$ )

**Figure S69.** The magnified HMBC NMR spectrum of compound **7** (500 MHz,  $\text{CDCl}_3$ )

**Figure S70.** NOESY NMR spectrum of compound **7** (500 MHz,  $\text{CDCl}_3$ )

**Figure S71.** HRESIMS spectrum of compound **8**

**Figure S72.** IR spectrum of compound **8**

**Figure S73.**  $^1\text{H}$  NMR spectrum of compound **8** (500 MHz,  $\text{CDCl}_3$ )

**Figure S74.**  $^{13}\text{C}$  NMR spectrum of compound **8** (125 MHz,  $\text{CDCl}_3$ )

**Figure S75.** DEPT NMR spectrum of compound **8** (125 MHz,  $\text{CDCl}_3$ )

**Figure S76.**  $^1\text{H}$ - $^1\text{H}$  COSY NMR spectrum of compound **8** (500 MHz,  $\text{CDCl}_3$ )

**Figure S77.** HSQC NMR spectrum of compound **8** (500 MHz,  $\text{CDCl}_3$ )

**Figure S78.** HMBC NMR spectrum of compound **8** (500 MHz,  $\text{CDCl}_3$ )

**Figure S79.** The magnified HMBC NMR spectrum of compound **8** (500 MHz,  $\text{CDCl}_3$ )

**Figure S80.** NOESY NMR spectrum of compound **8** (500 MHz,  $\text{CDCl}_3$ )

**Figure S81.**  $^1\text{H}$  NMR spectrum of Isovaleric acid (500 MHz,  $\text{CDCl}_3$ )

**Figure S82.**  $^{13}\text{C}$  NMR spectrum of Isovaleric acid (125 MHz,  $\text{CDCl}_3$ )

**Figure S83.** DEPT NMR spectrum of Isovaleric acid (125 MHz,  $\text{CDCl}_3$ )

**Figure S84.** Viability of A549 cells after exposure to 0.1% DMSO or various concentrations of compound **2** for 24, 48, and 72 h.

**Figure S1.** HRESIMS spectrum of compound **1**

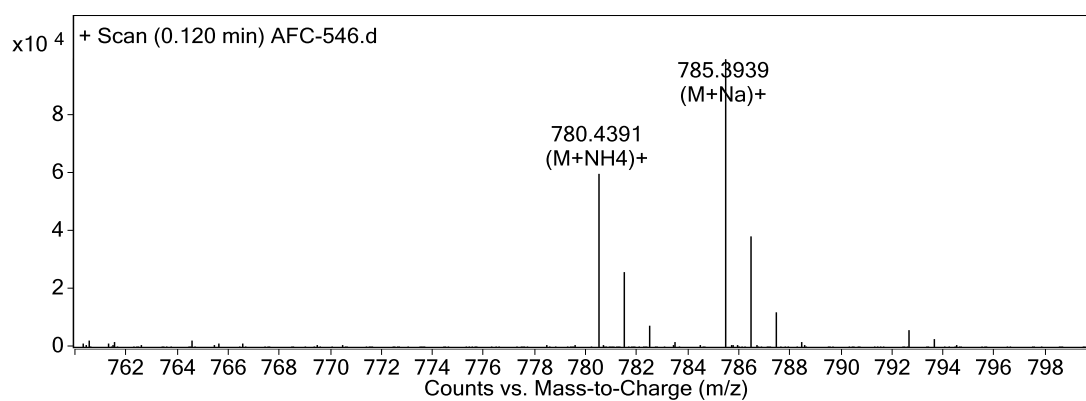

**Figure S2.** IR spectrum of compound **1**

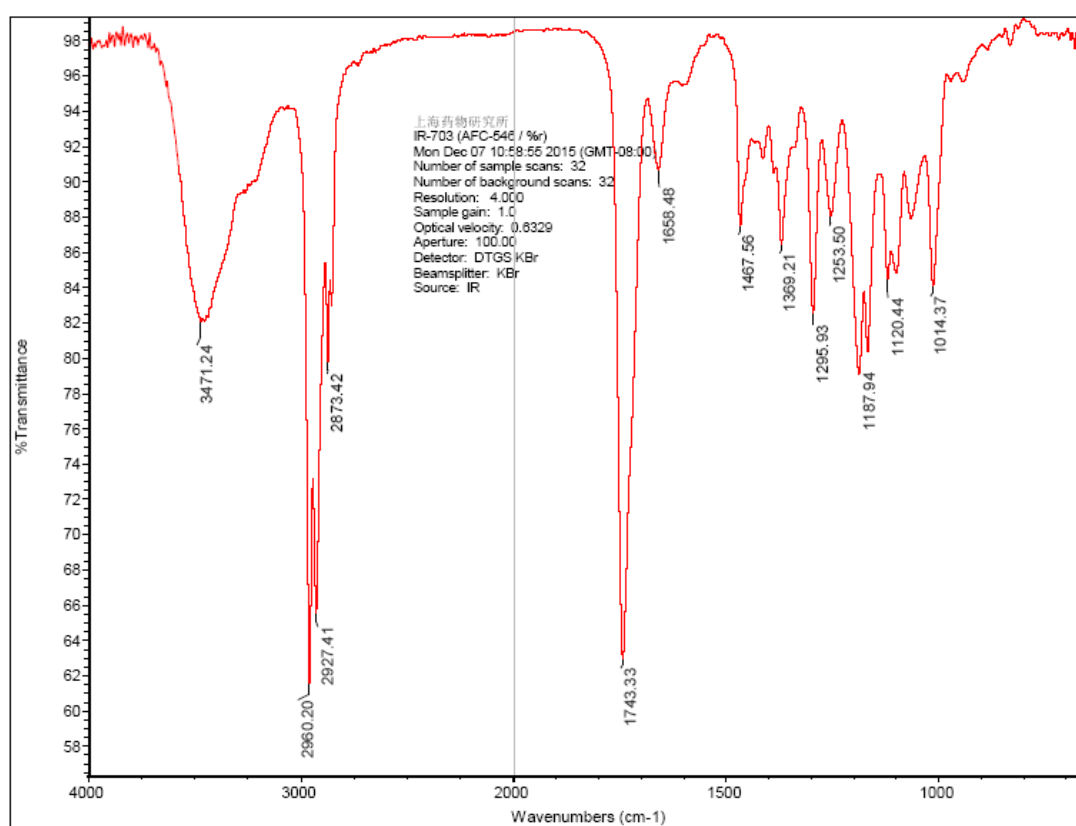

**Figure S3.** <sup>1</sup>H NMR spectrum of compound **1** (500 MHz, CDCl<sub>3</sub>)

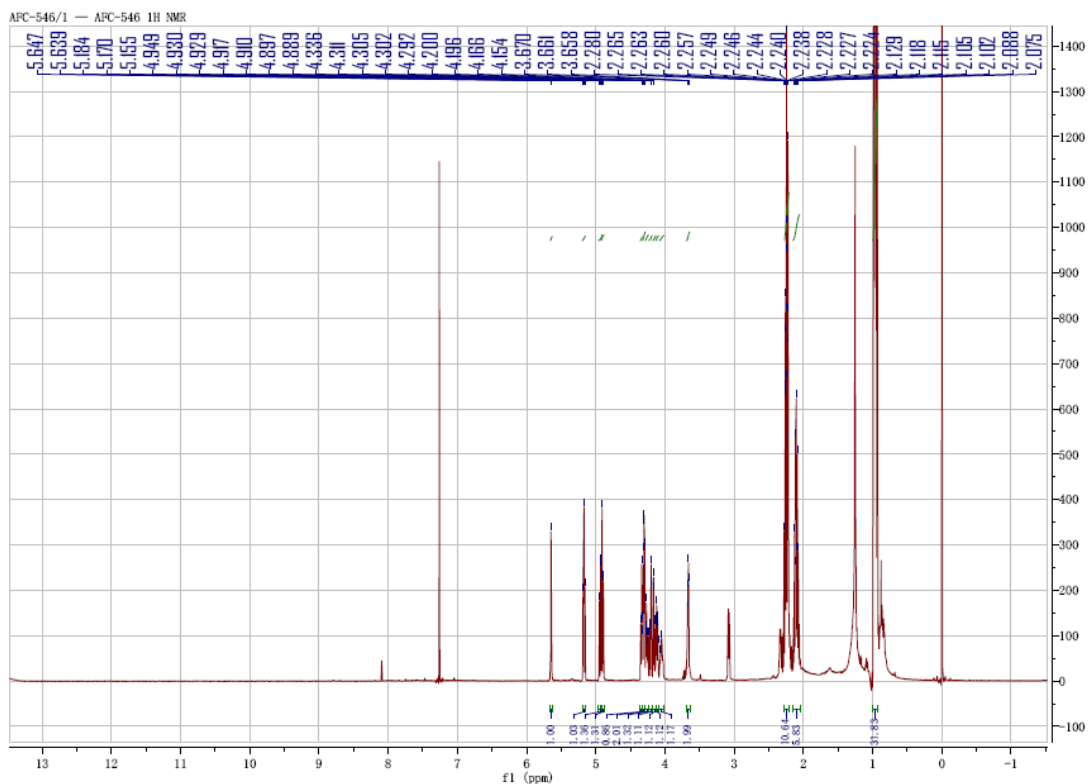

**Figure S4.**  $^{13}\text{C}$  NMR spectrum of compound **1** (125 MHz,  $\text{CDCl}_3$ )

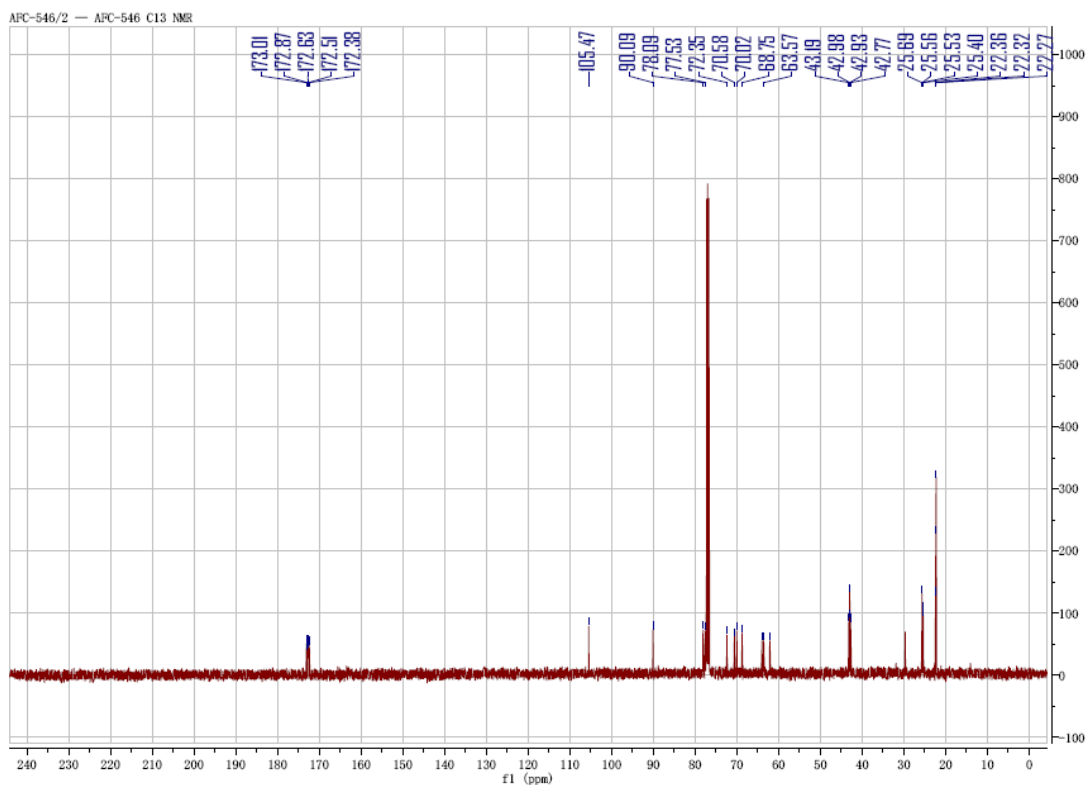

**Figure S5.** DEPT NMR spectrum of compound **1** (125 MHz,  $\text{CDCl}_3$ )

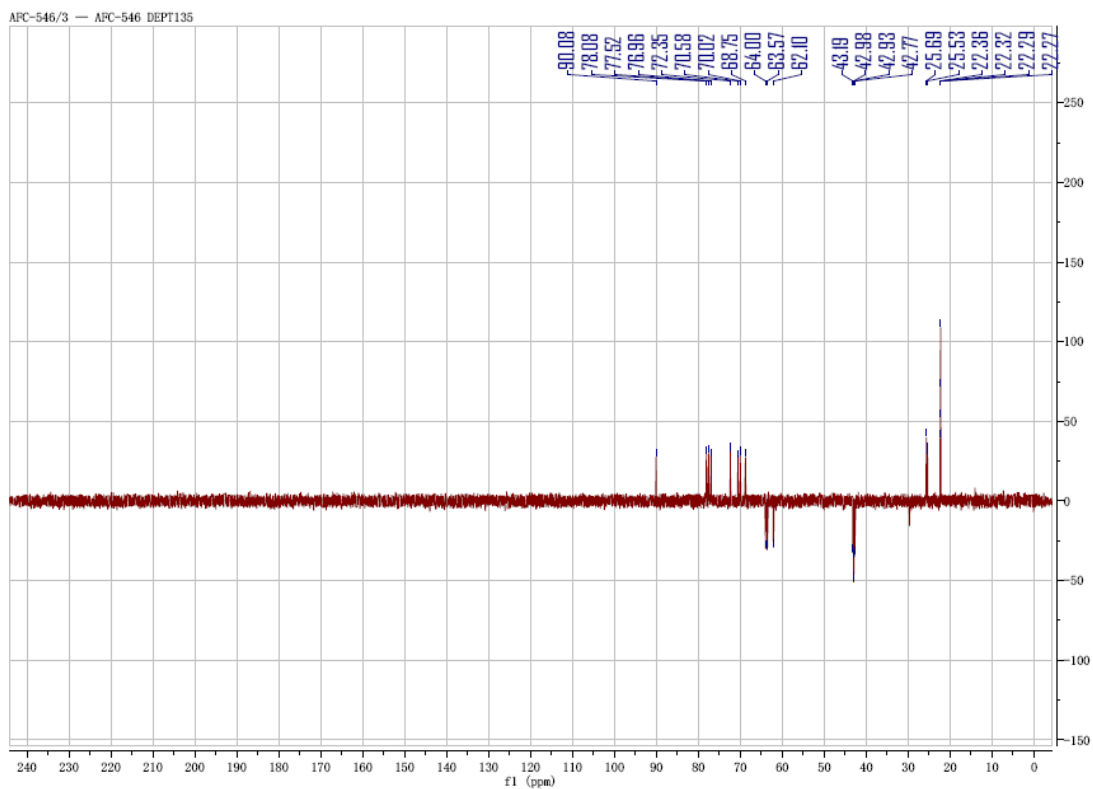

**Figure S6.**  $^1\text{H}$ - $^1\text{H}$  COSY NMR spectrum of compound **1** (500 MHz,  $\text{CDCl}_3$ )

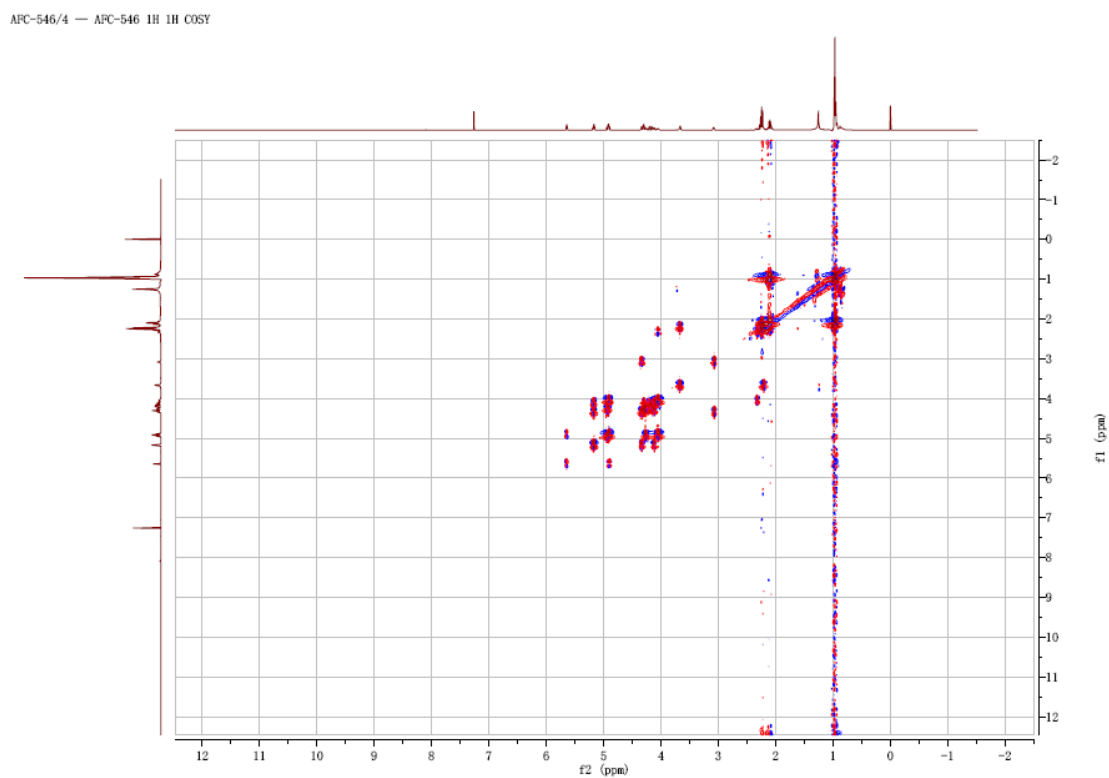

**Figure S7.** HSQC NMR spectrum of compound **1** (500 MHz,  $\text{CDCl}_3$ )

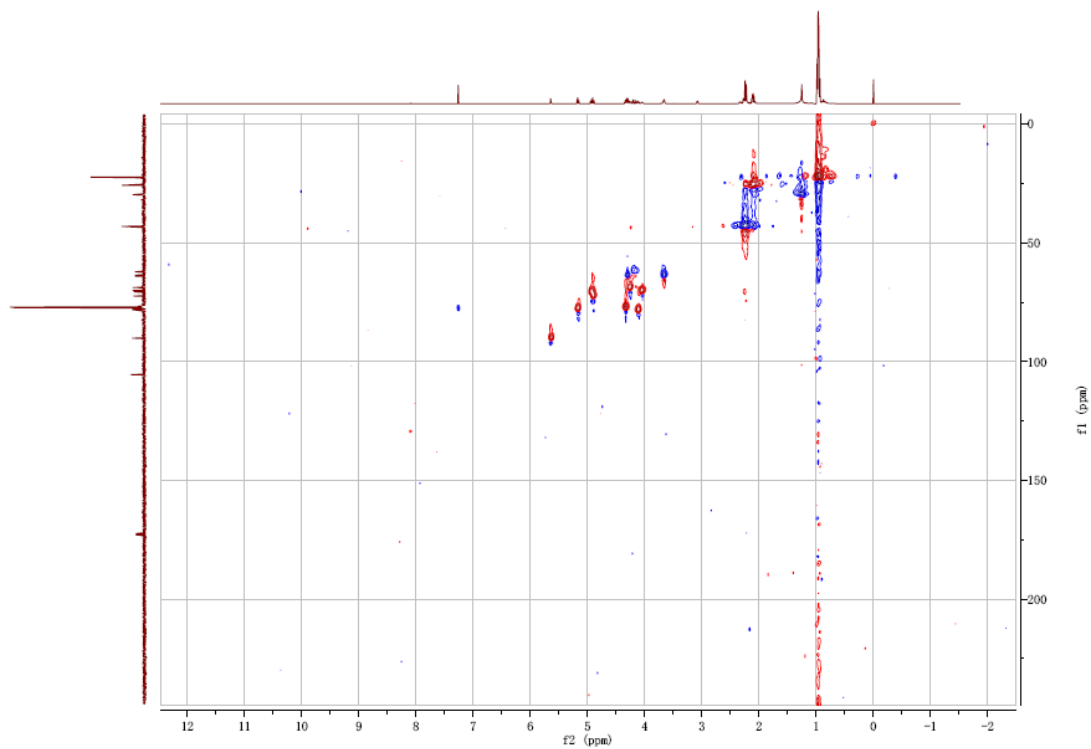

**Figure S8.** HMBC NMR spectrum of compound **1** (500 MHz, CDCl<sub>3</sub>)

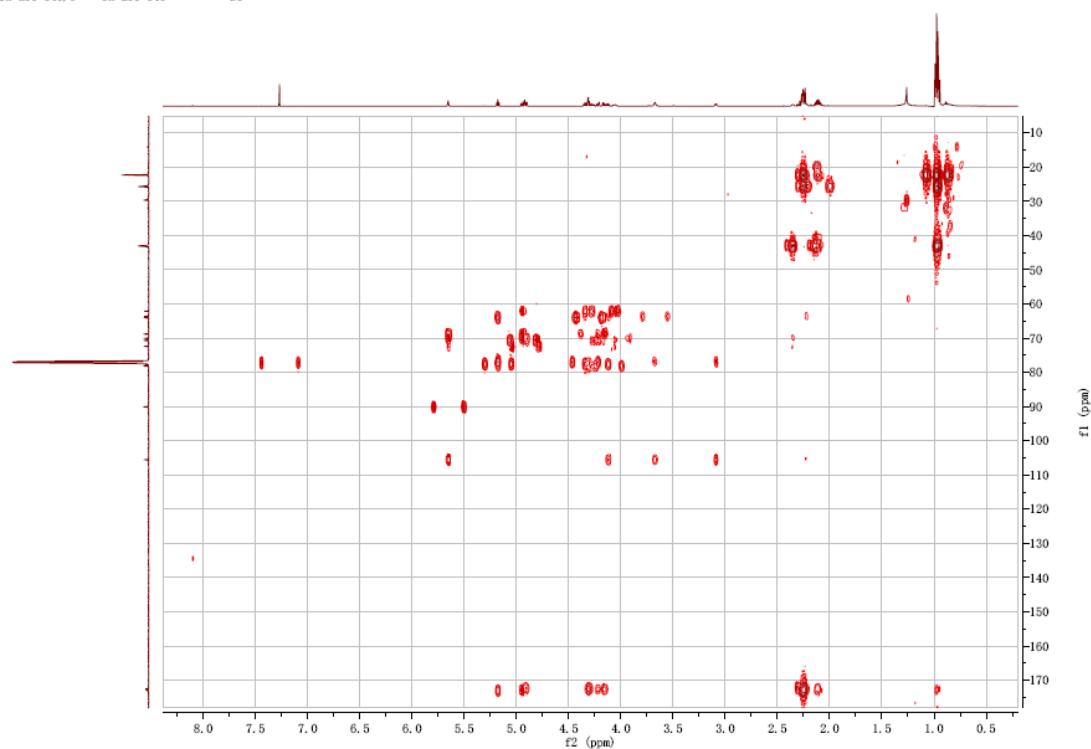

**Figure S9.** The magnified HMBC NMR spectrum of compound **1** (500 MHz, CDCl<sub>3</sub>)



fx-afc-546/6 — fx-afc-546 — — BC

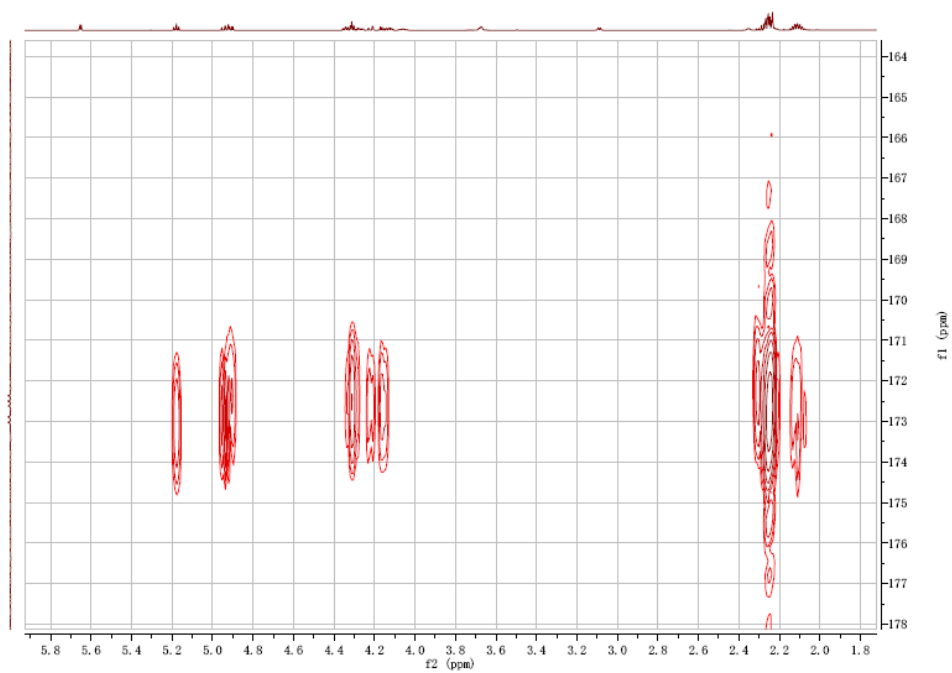

**Figure S10.** NOESY NMR spectrum of compound **1** (500 MHz,  $\text{CDCl}_3$ )

APC-546/7 — APC-546 NOE

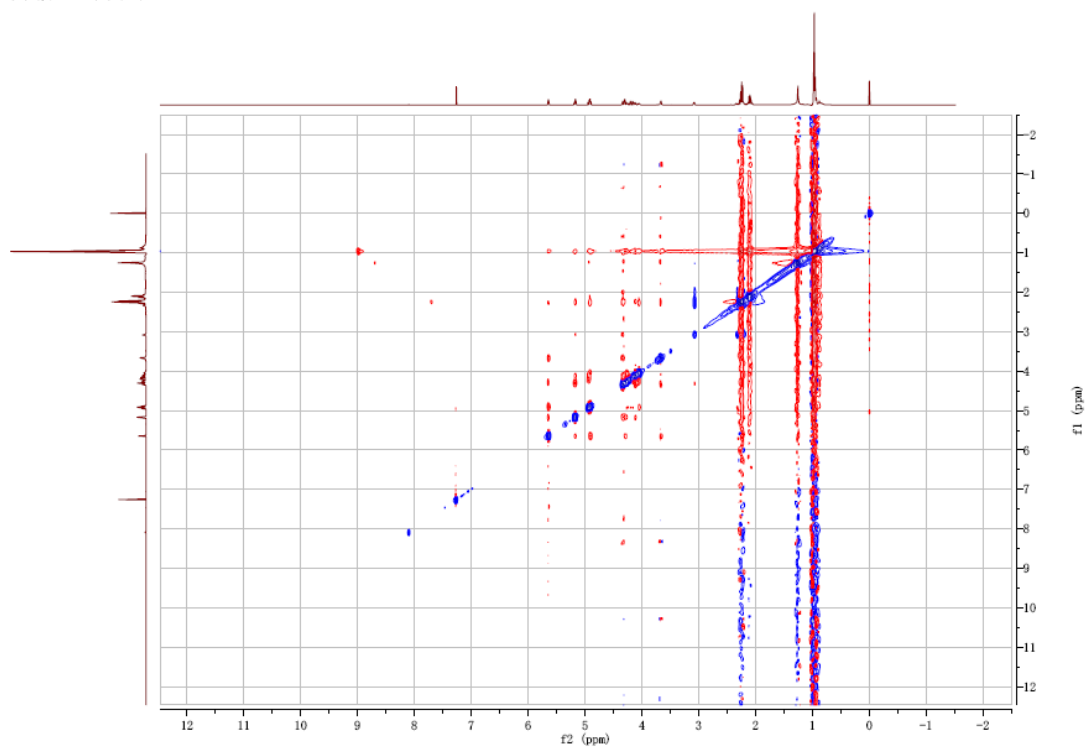

**Figure S11.** HRESIMS spectrum of compound **2**

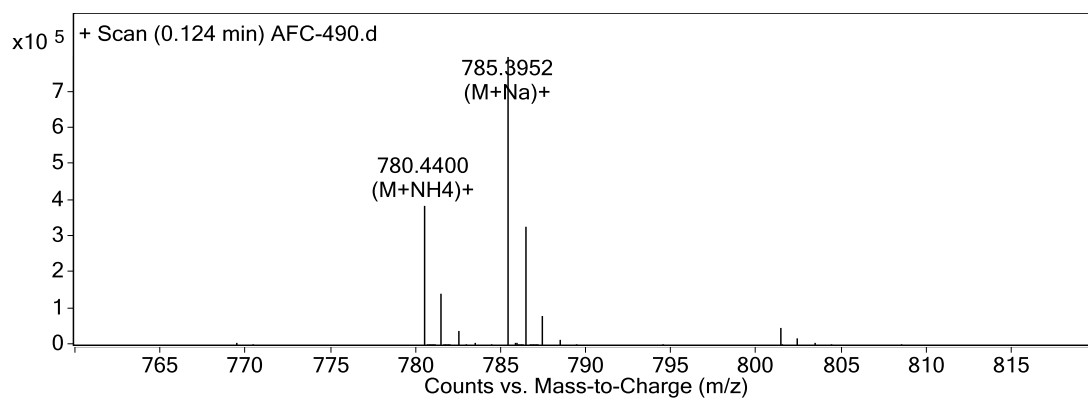

**Figure S12.** IR spectrum of compound **2**

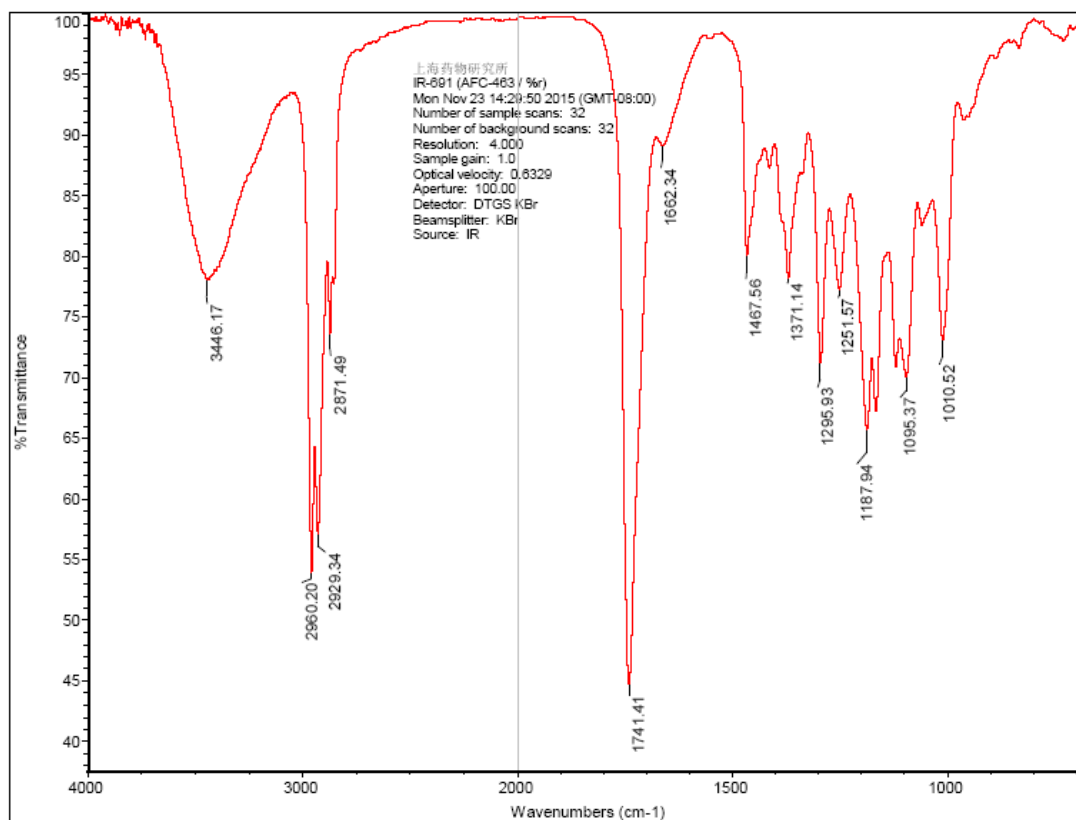

**Figure S13.** <sup>1</sup>H NMR spectrum of compound **2** (500 MHz, CDCl<sub>3</sub>)



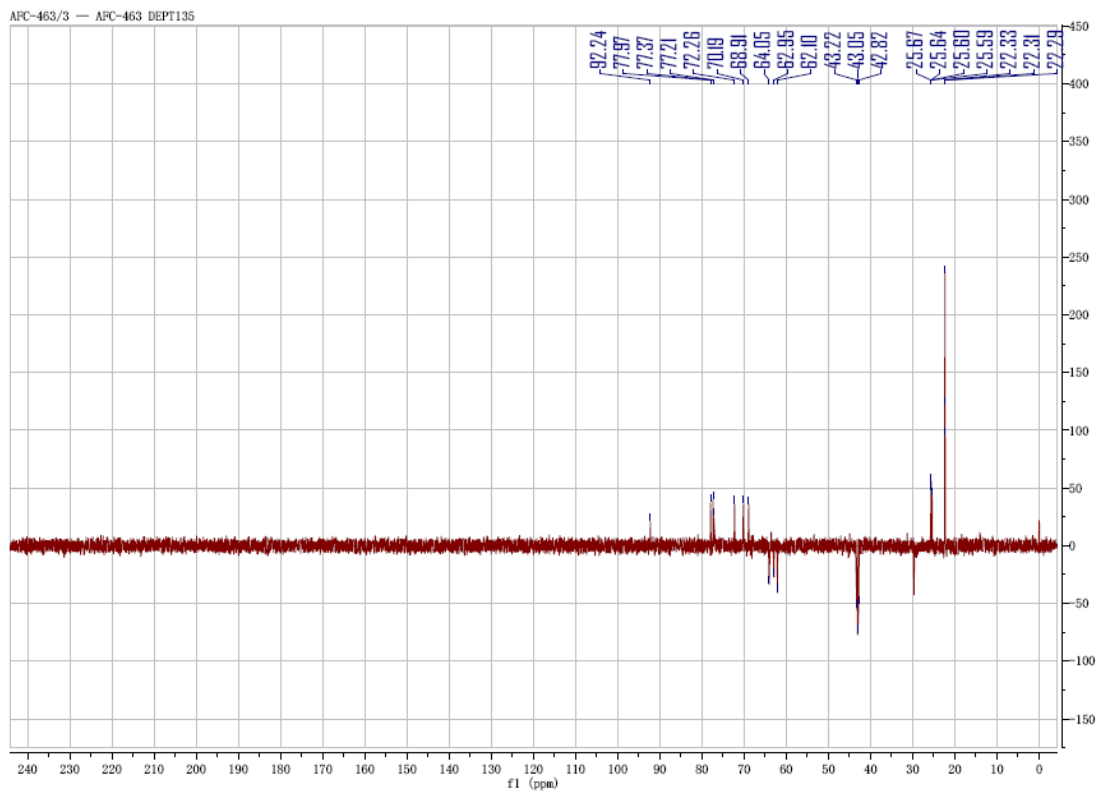

**Figure S16.**  $^1\text{H}$ - $^1\text{H}$  COSY NMR spectrum of compound **2** (500 MHz,  $\text{CDCl}_3$ )

AFC-463/4 — AFC-463 1H 1H COSY

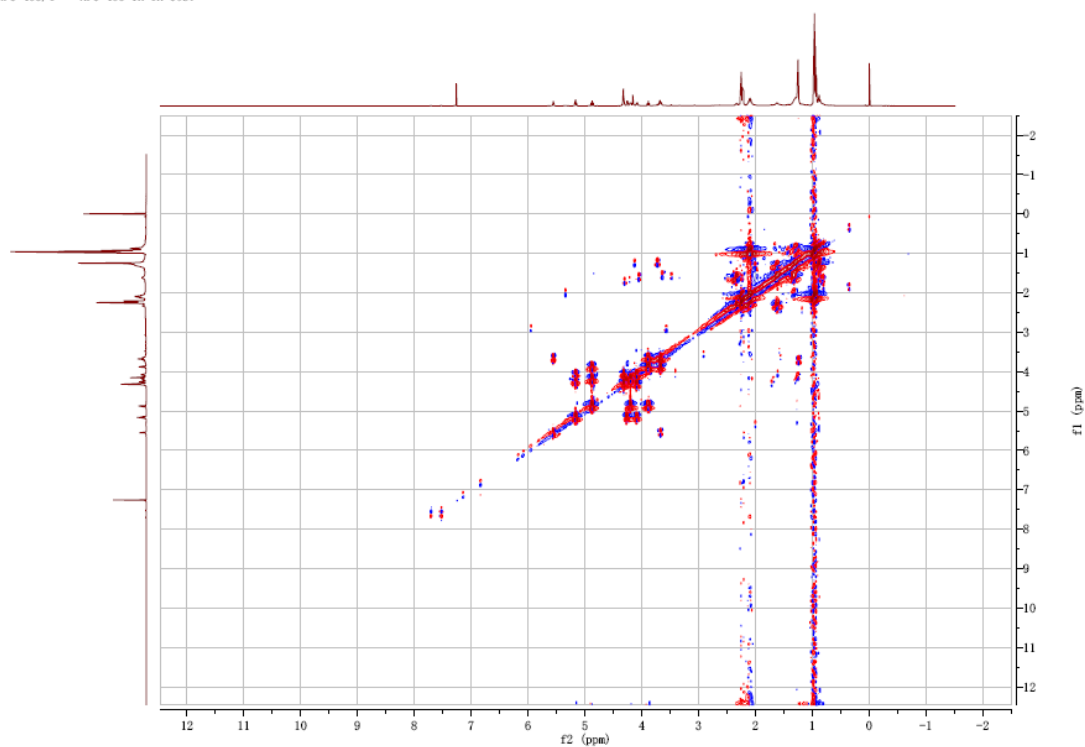

**Figure S17.** HSQC NMR spectrum of compound **2** (500 MHz,  $\text{CDCl}_3$ )

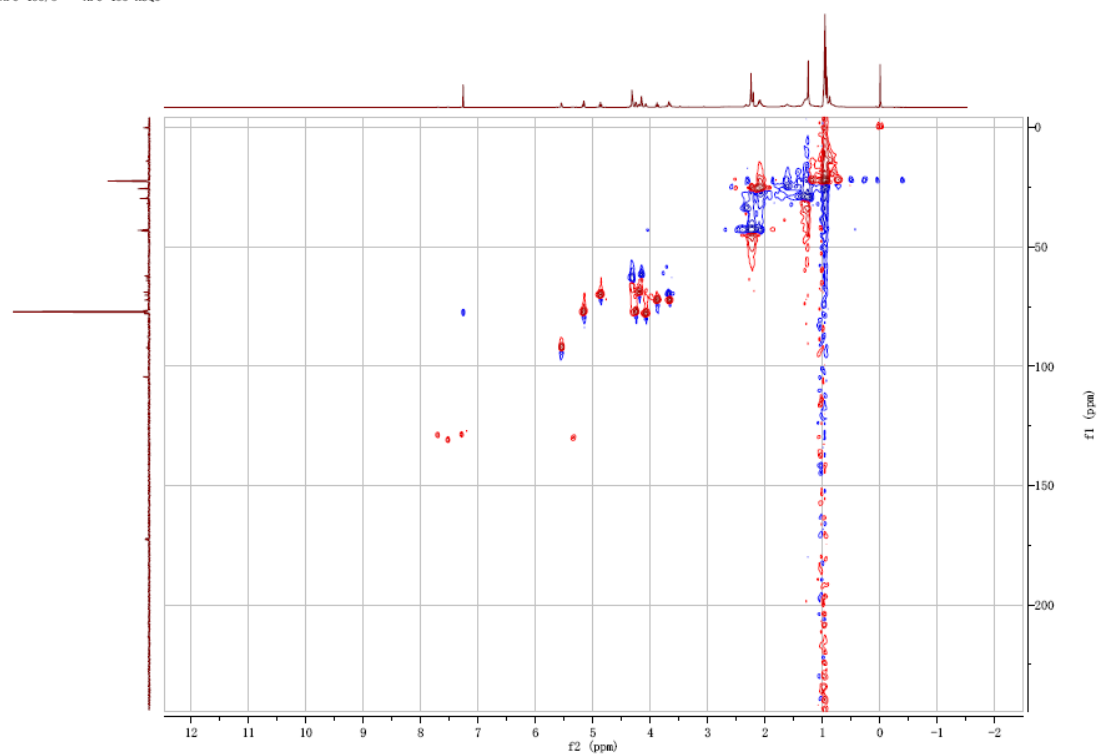

**Figure S18.** HMBC NMR spectrum of compound **2** (500 MHz, CDCl<sub>3</sub>)

afc-463/6 — afc-463 — — BC

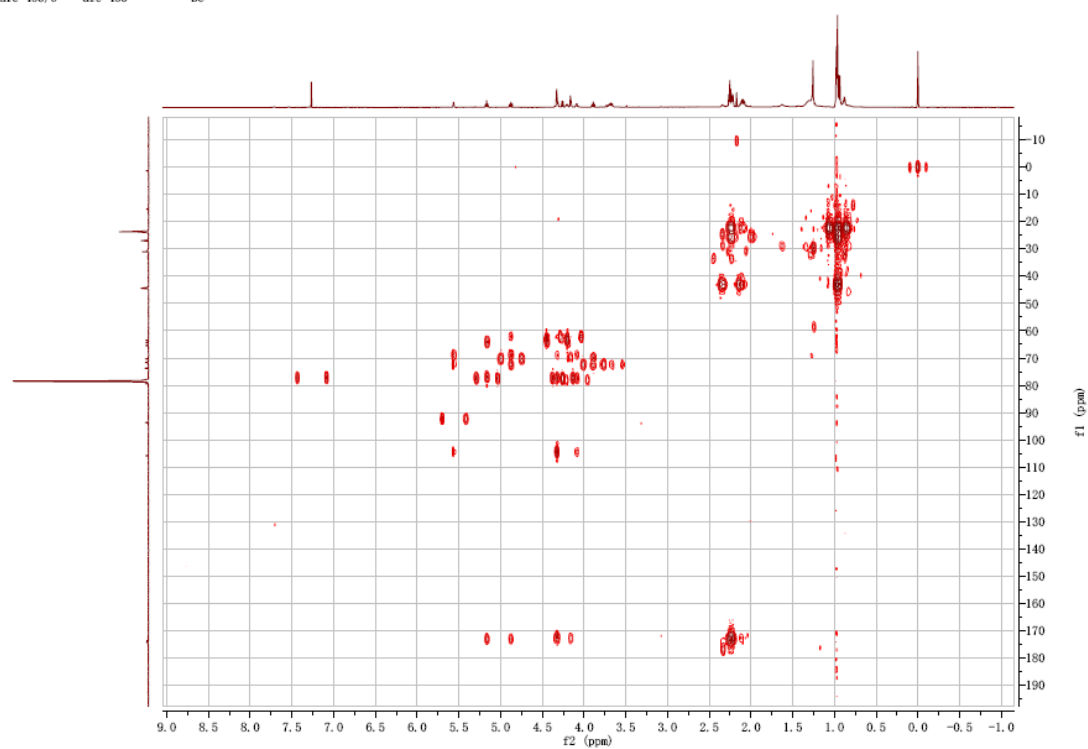

**Figure S19.** The magnified HMBC NMR spectrum of compound **2** (500 MHz, CDCl<sub>3</sub>)

afc-463/6 — afc-463 — — BC

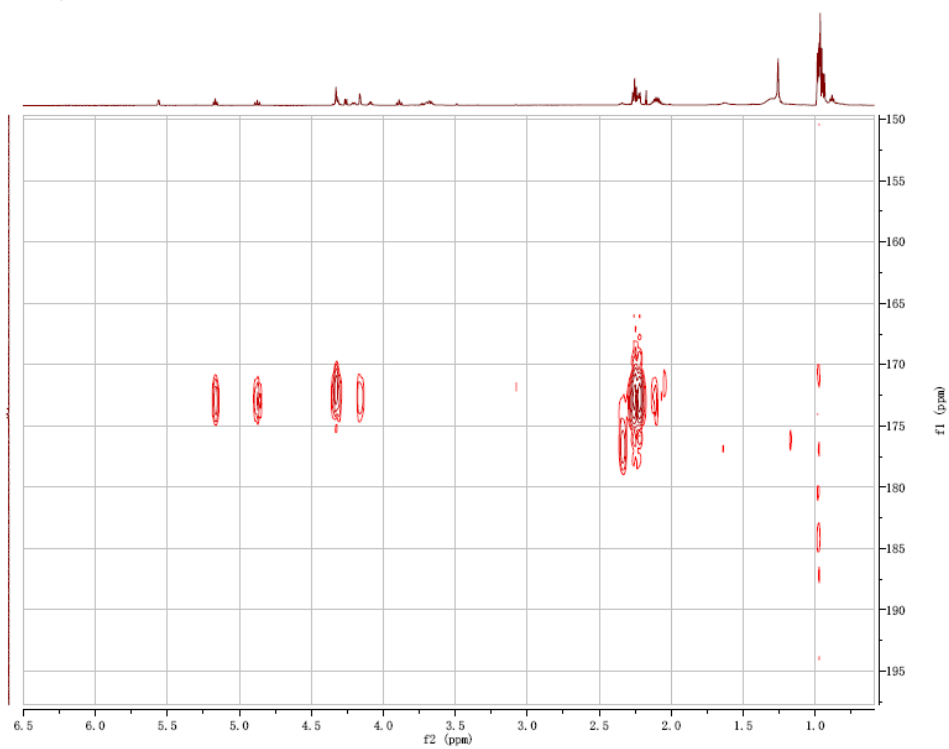

**Figure S20.** NOESY NMR spectrum of compound **2** (500 MHz,  $\text{CDCl}_3$ )

APC-463/7 — APC-463 NOESY

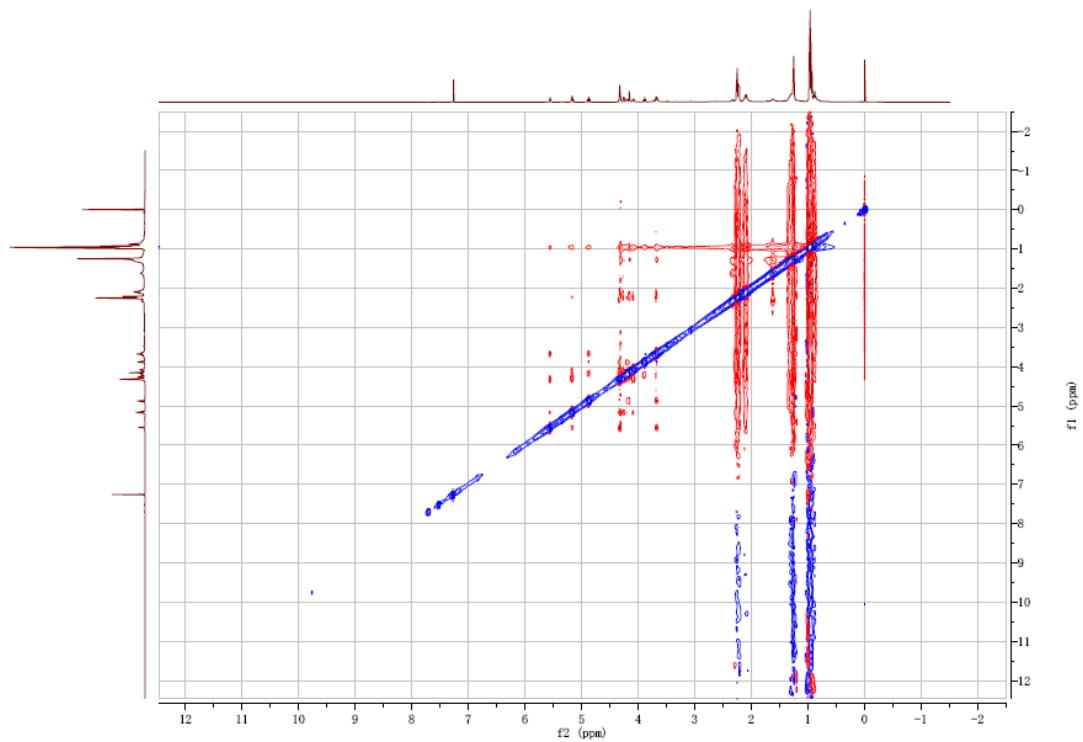

**Figure S21.** HRESIMS spectrum of compound **3**

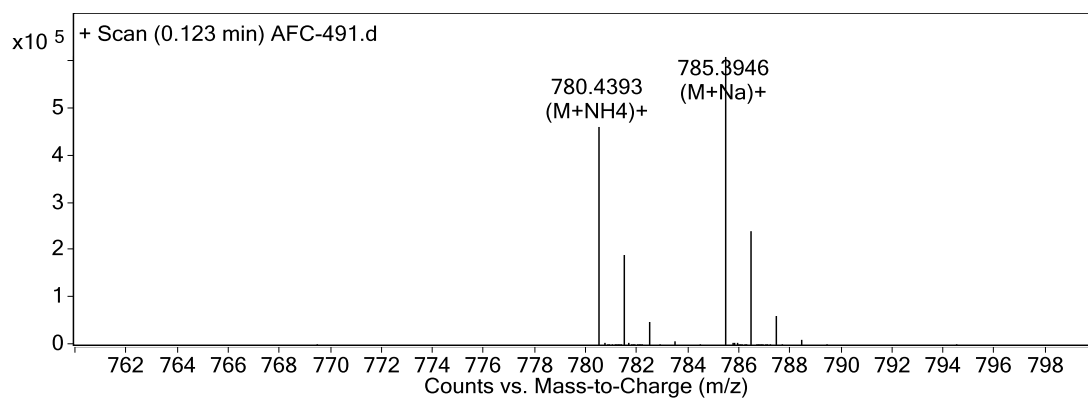

**Figure S22.** IR spectrum of compound **3**

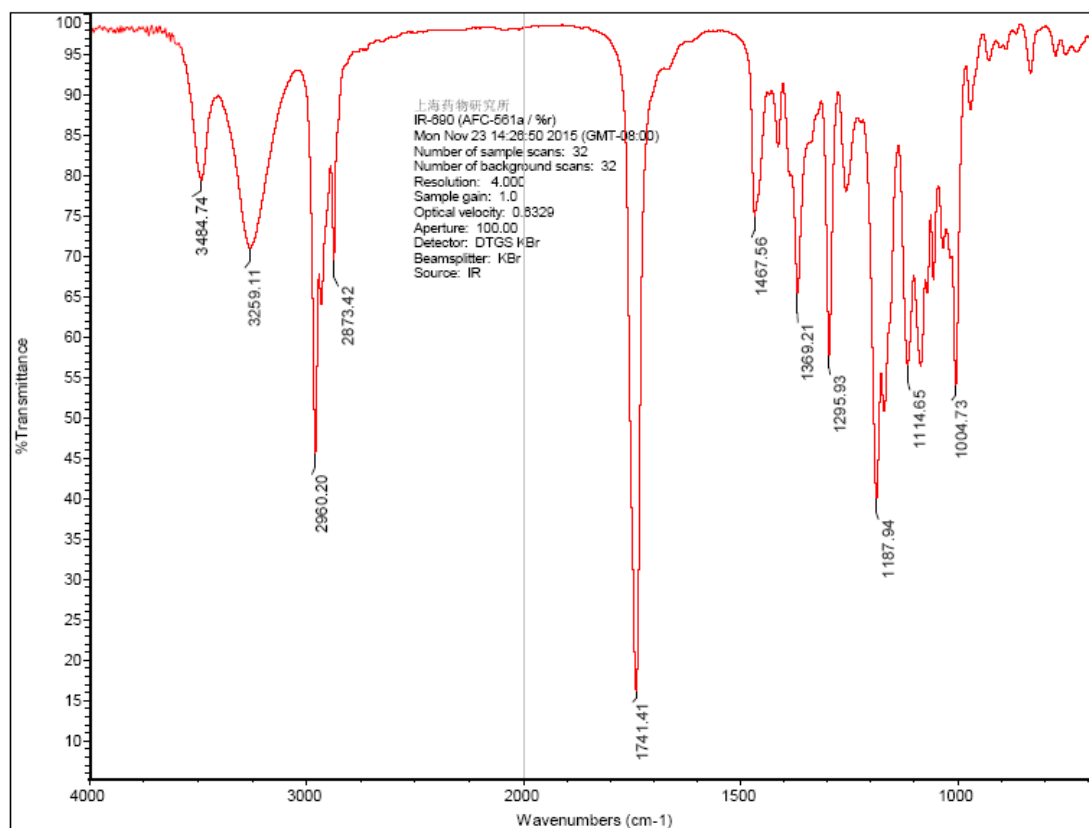

**Figure S23.** <sup>1</sup>H NMR spectrum of compound **3** (500 MHz, CDCl<sub>3</sub>)





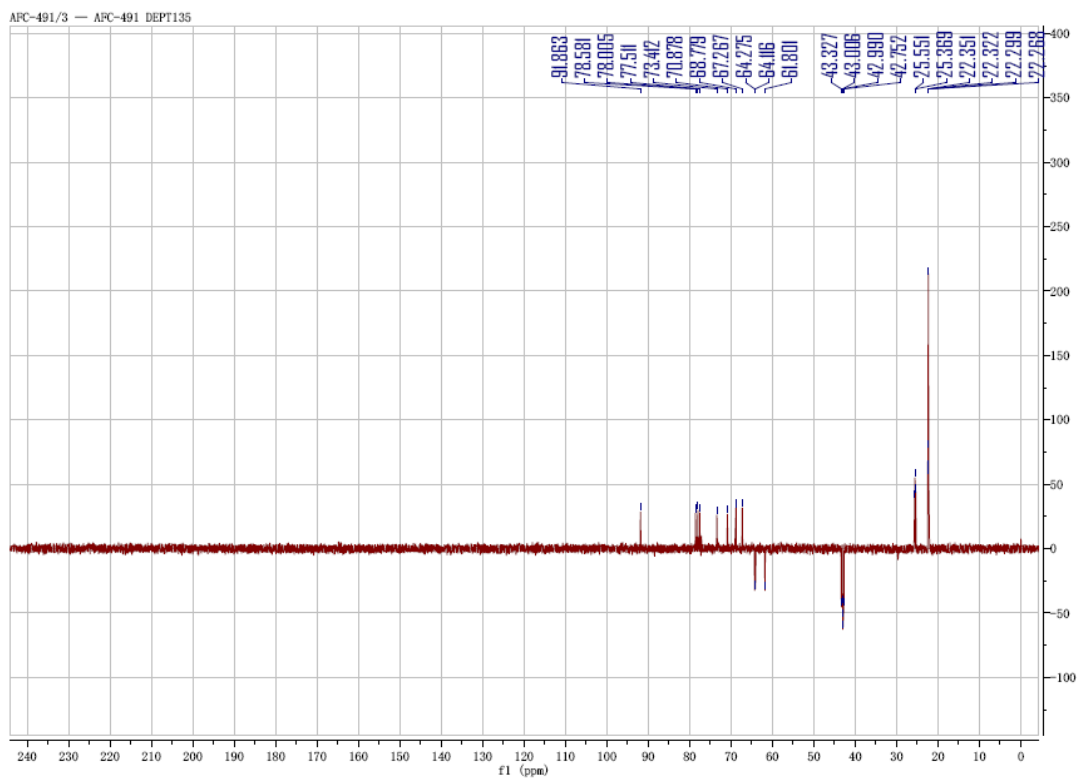

**Figure S26.**  $^1\text{H}$ - $^1\text{H}$  COSY NMR spectrum of compound **3** (500 MHz,  $\text{CDCl}_3$ )

APC-491/4 — APC-491 1H 1H COSY

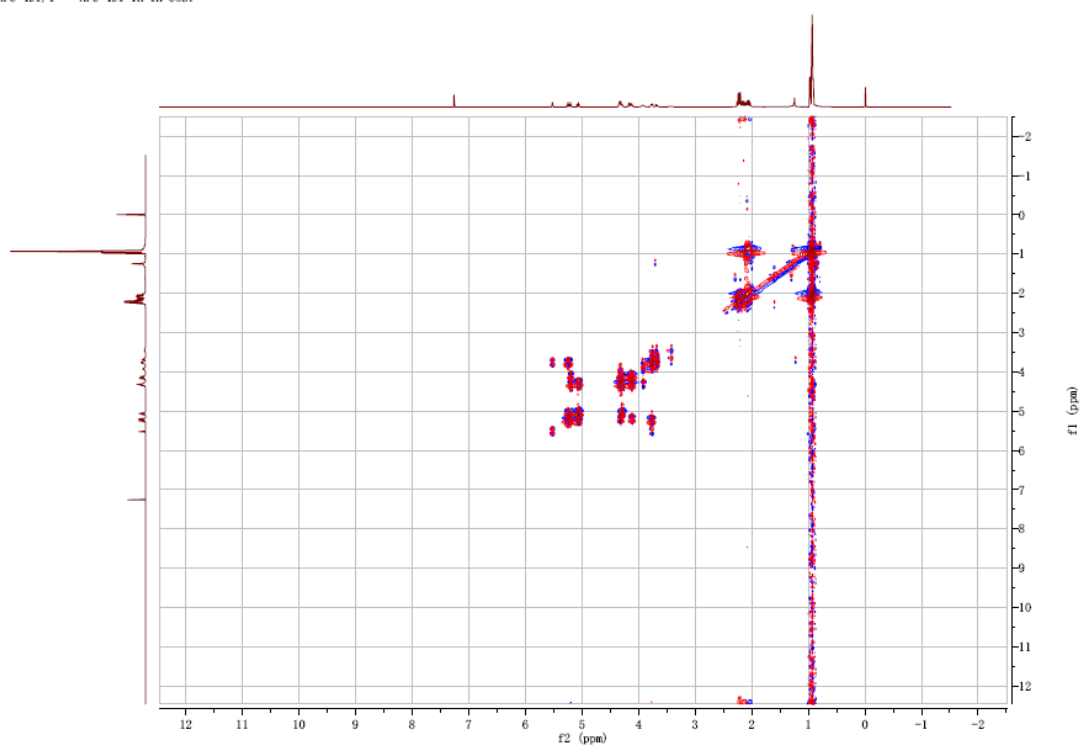

**Figure S27.** HSQC NMR spectrum of compound **3** (500 MHz,  $\text{CDCl}_3$ )

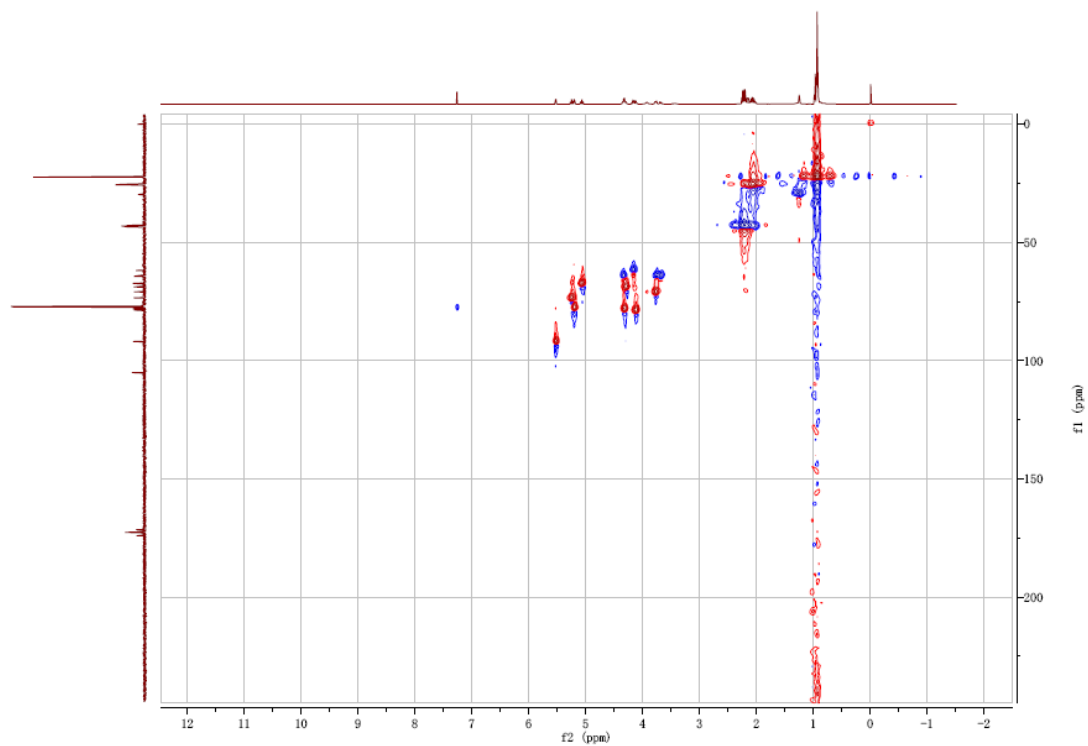

**Figure S28.** HMBC NMR spectrum of compound **3** (500 MHz, CDCl<sub>3</sub>)

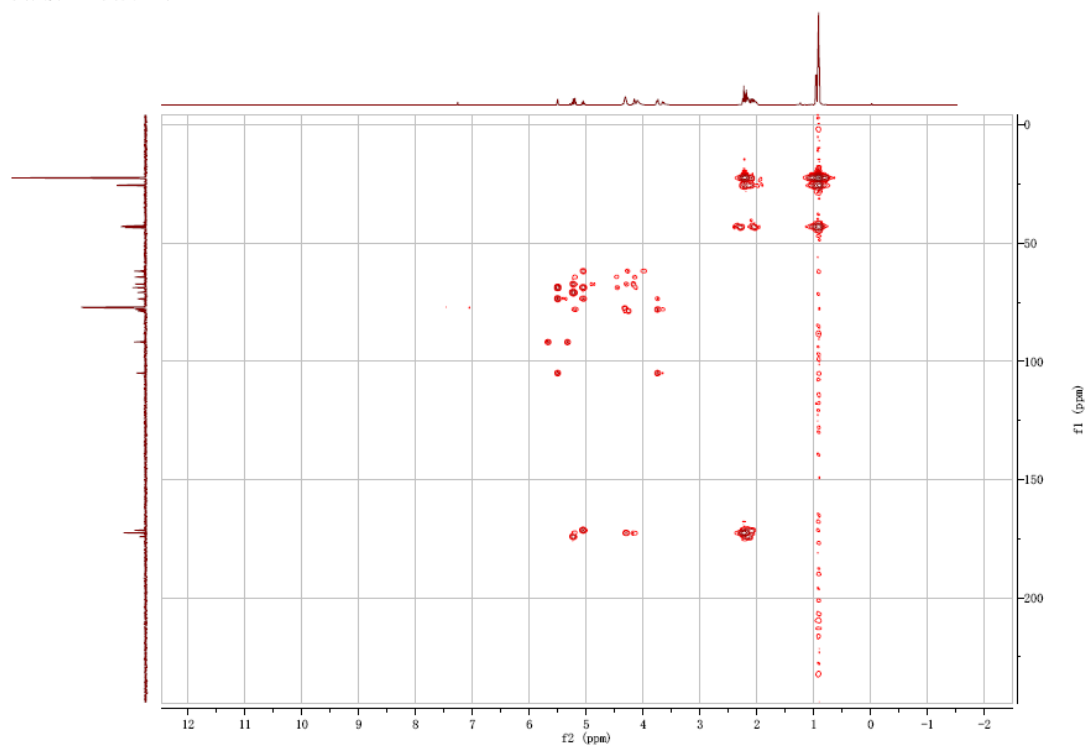

**Figure S29.** The magnified HMBC NMR spectrum of compound **3** (500 MHz, CDCl<sub>3</sub>)

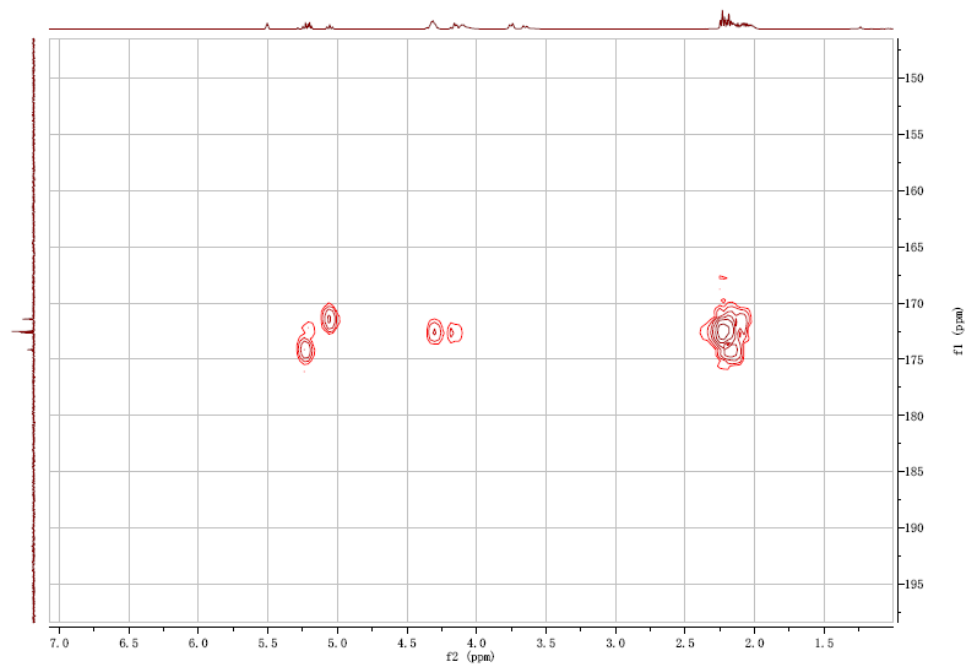

**Figure S30.** NOESY NMR spectrum of compound **3** (500 MHz, CDCl<sub>3</sub>)

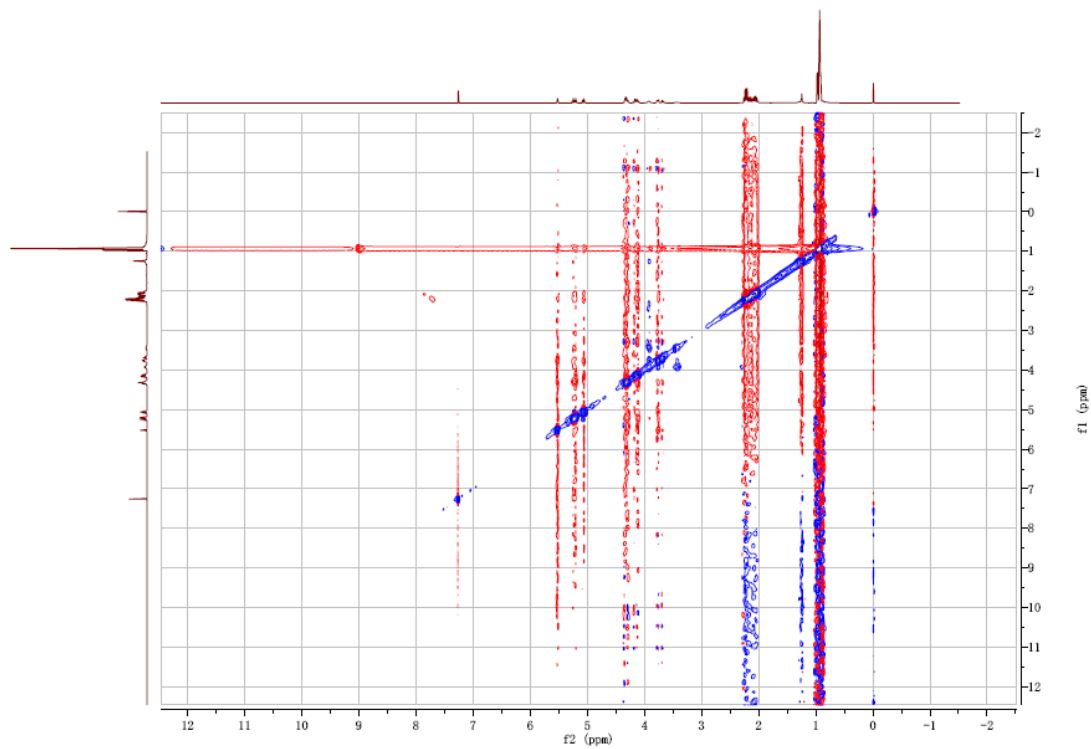

**Figure S31.** HRESIMS spectrum of compound **4**

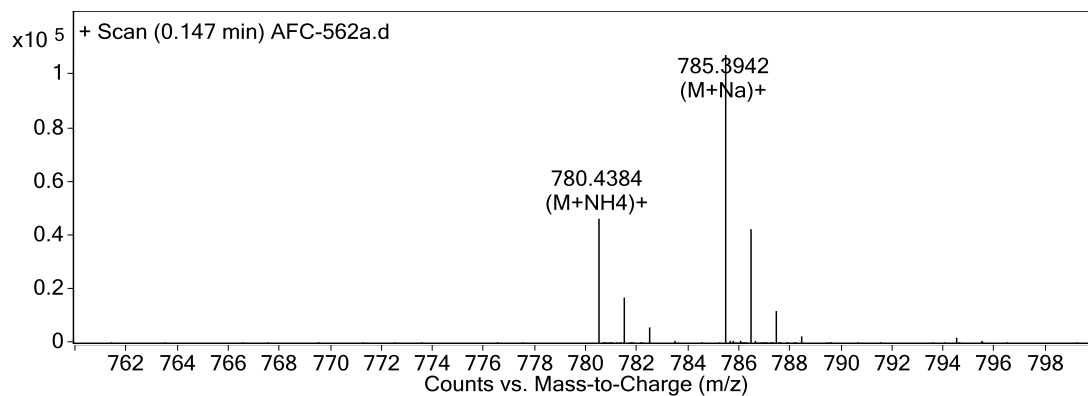

**Figure S32.** IR spectrum of compound **4**

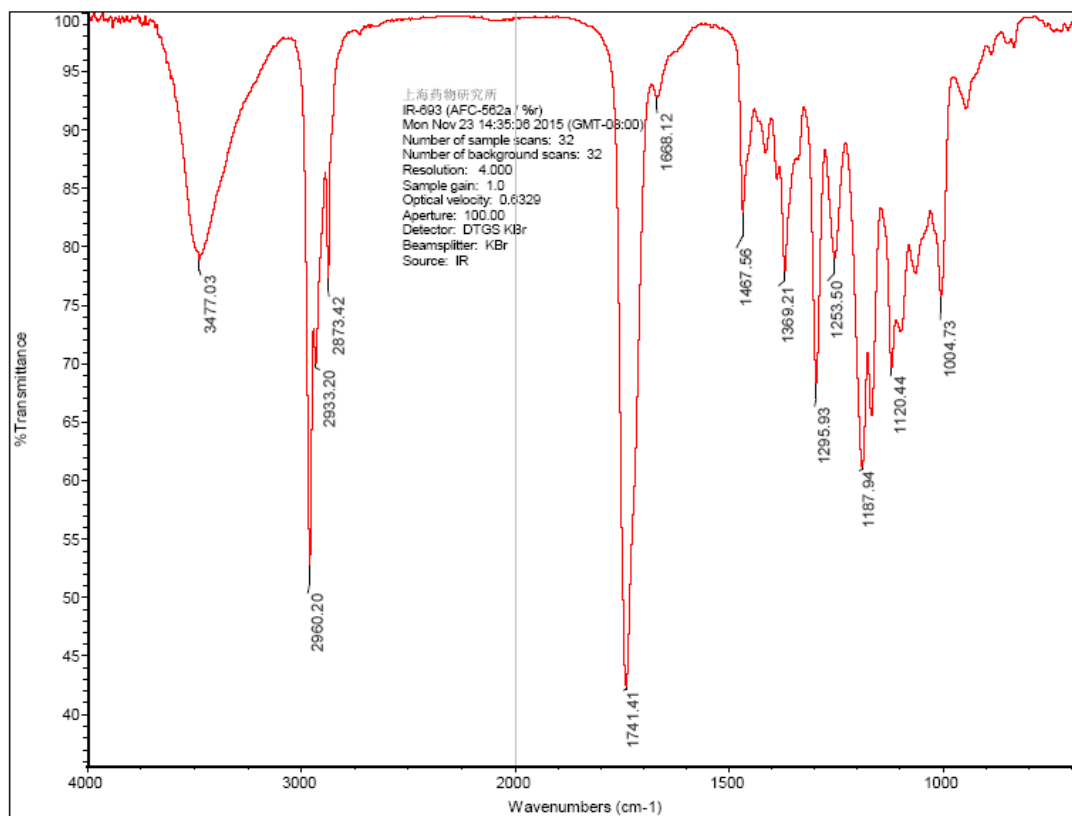

**Figure S33.** <sup>1</sup>H NMR spectrum of compound **4** (500 MHz, CDCl<sub>3</sub>)

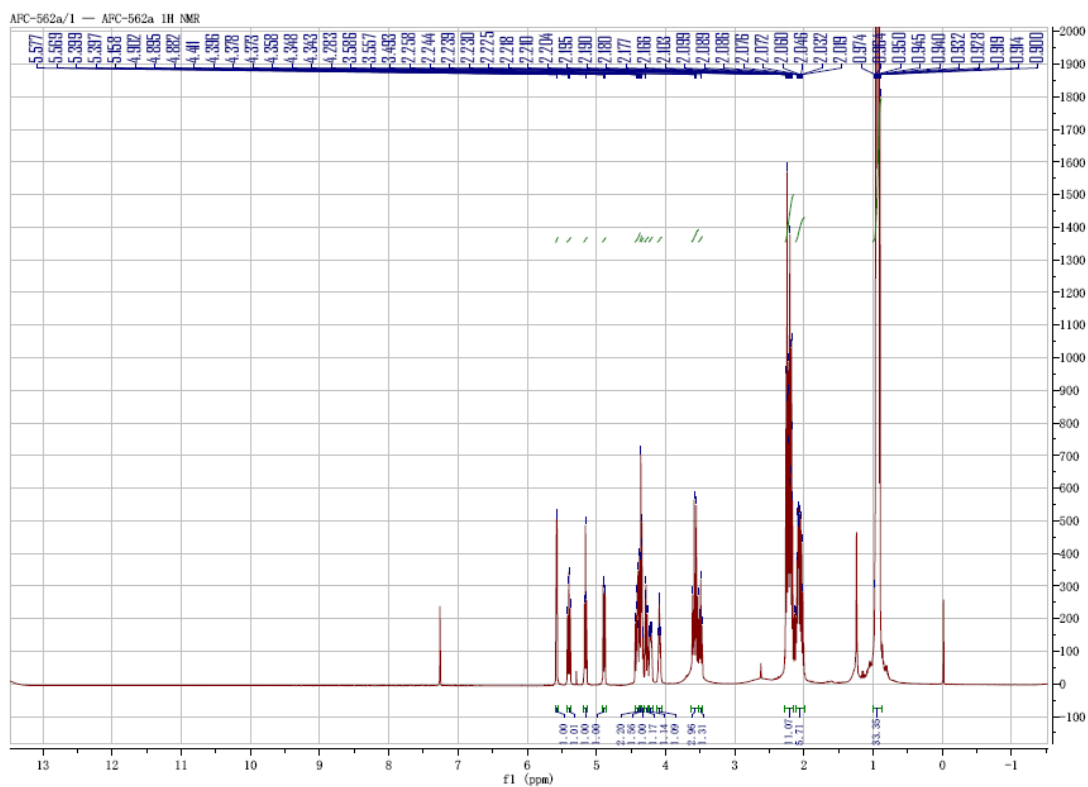

Figure S34. <sup>13</sup>C NMR spectrum of compound **4** (125 MHz, CDCl<sub>3</sub>)

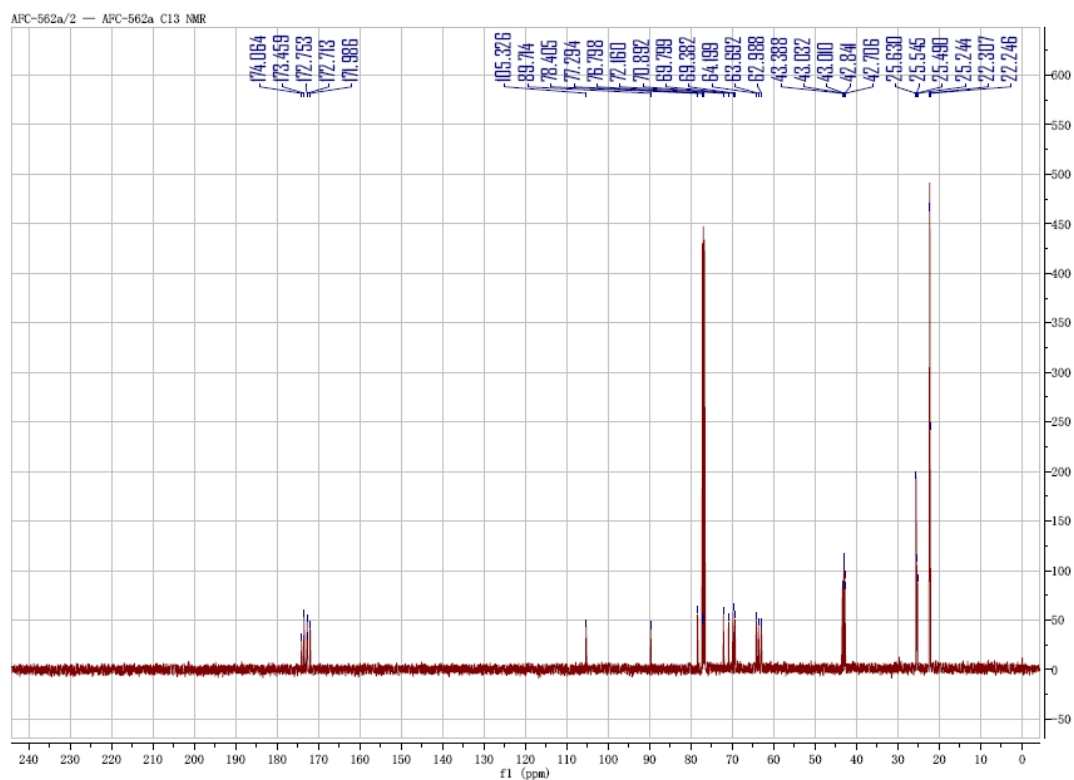

Figure S35. DEPT NMR spectrum of compound **4** (125 MHz, CDCl<sub>3</sub>)

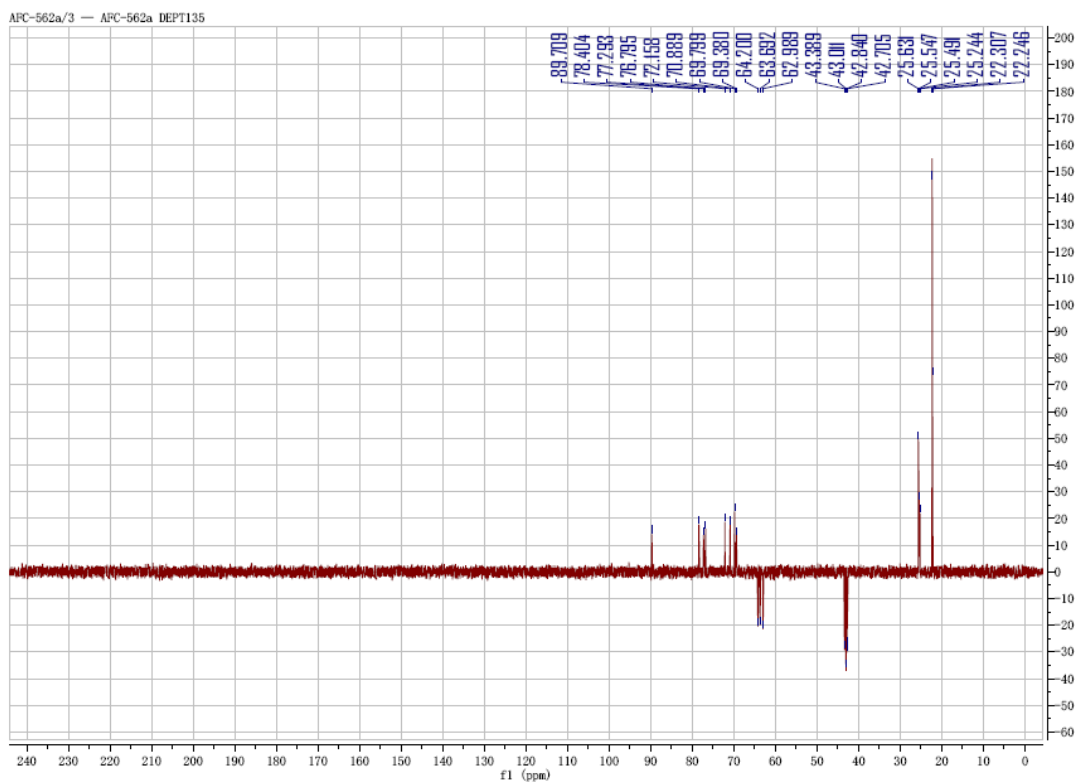

**Figure S36.**  $^1\text{H}$ - $^1\text{H}$  COSY NMR spectrum of compound **4** (500 MHz,  $\text{CDCl}_3$ )

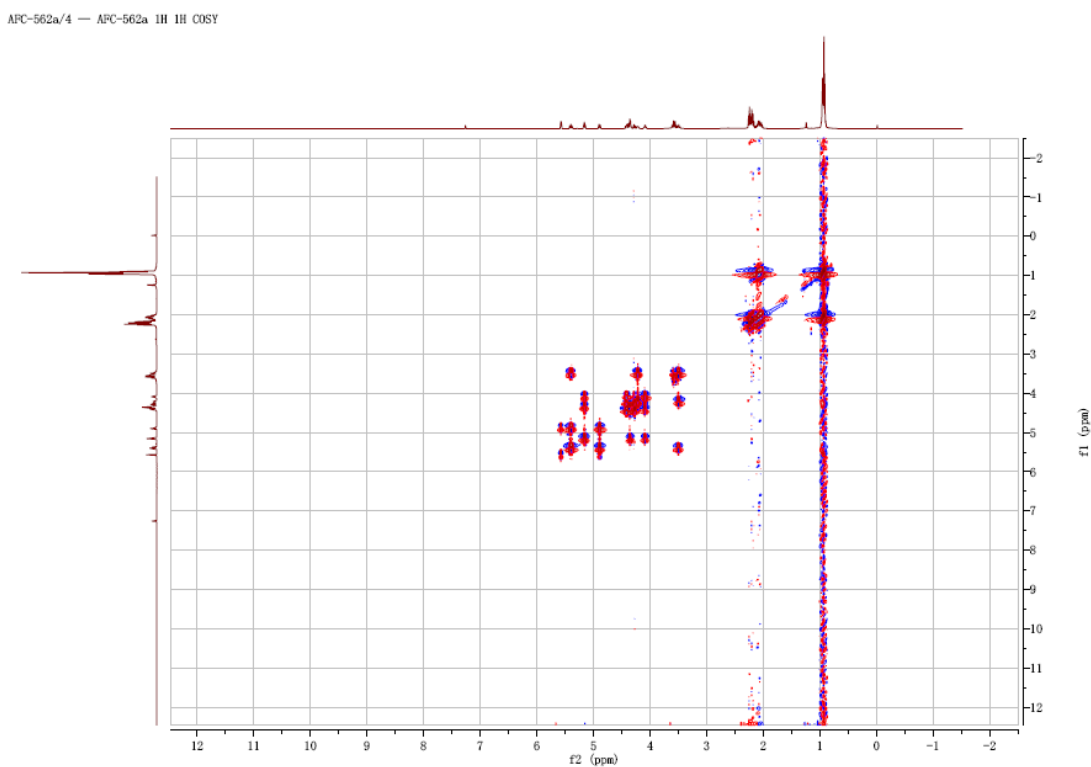

**Figure S37.** HSQC NMR spectrum of compound **4** (500 MHz,  $\text{CDCl}_3$ )

APC-562a/5 — APC-562a HSQC

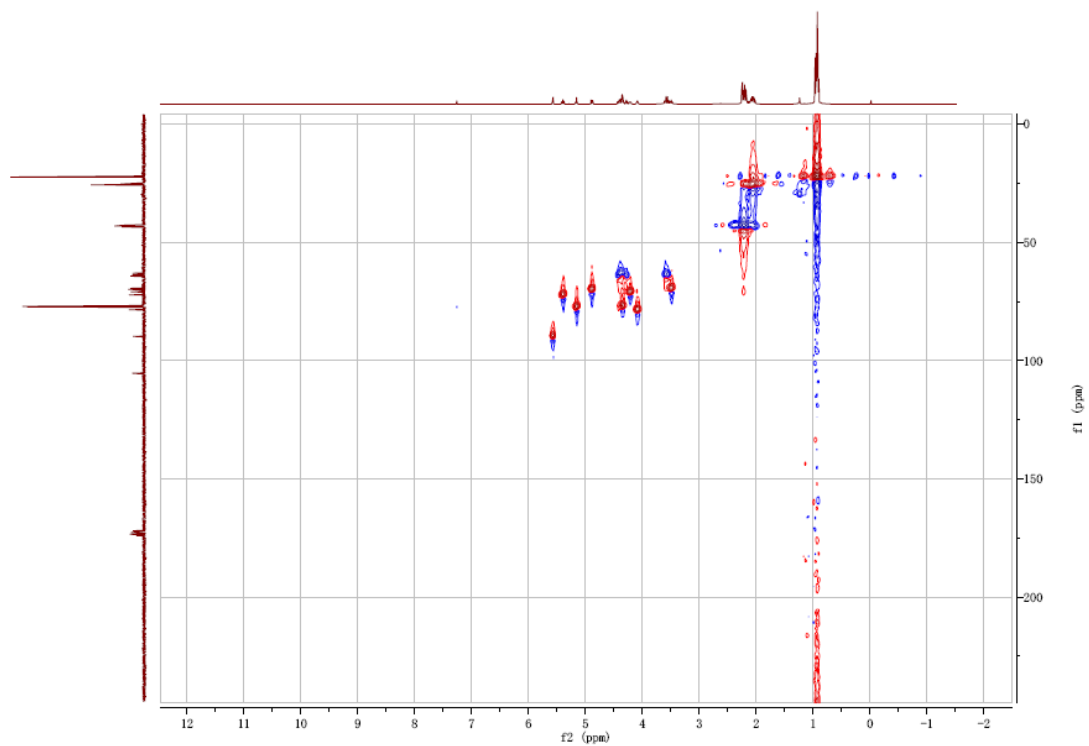

**Figure S38.** HMBC NMR spectrum of compound **4** (500 MHz, CDCl<sub>3</sub>)

APC-562a/6 — APC-562a HMBC

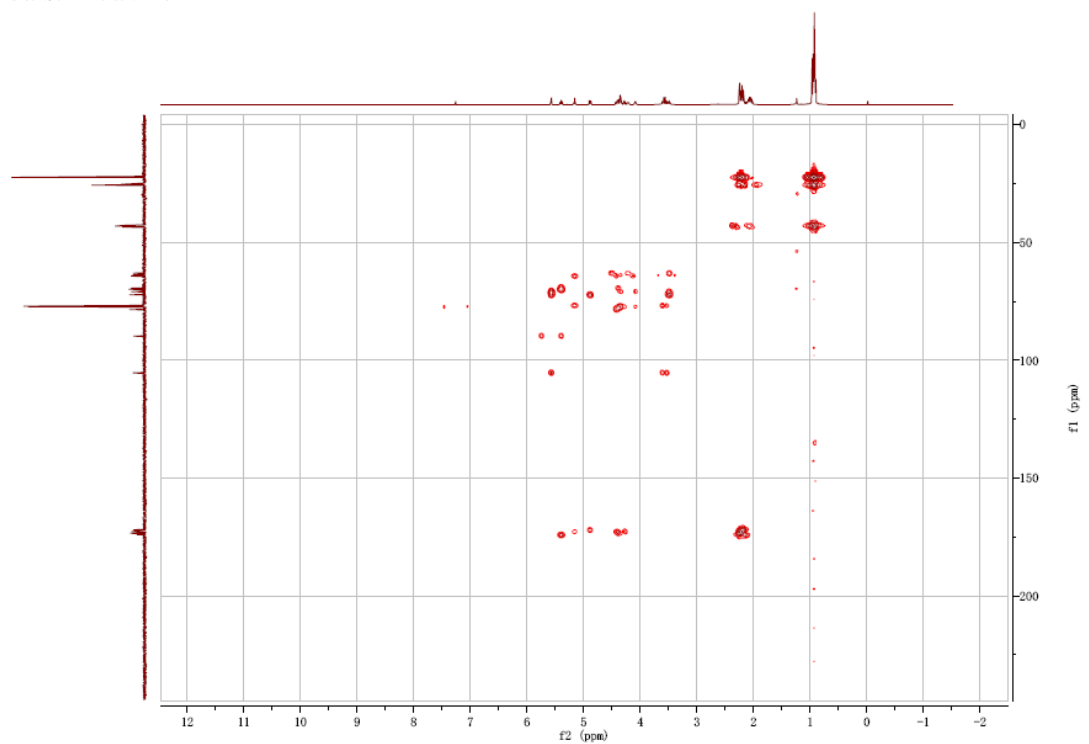

**Figure S39.** The magnified HMBC NMR spectrum of compound **4** (500 MHz, CDCl<sub>3</sub>)

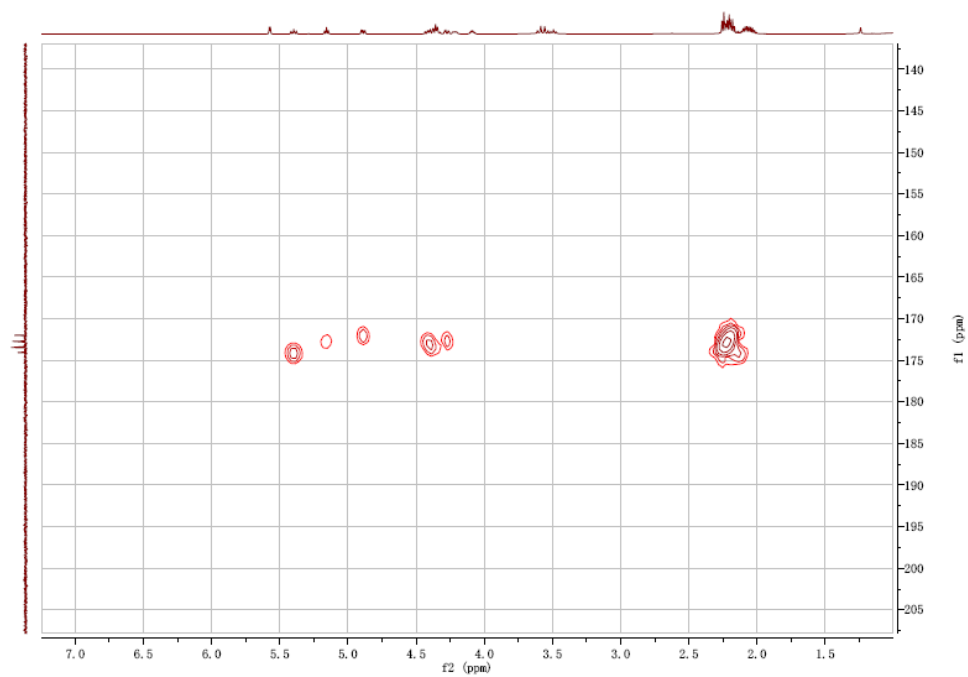

**Figure S40.** NOESY NMR spectrum of compound **4** (500 MHz,  $\text{CDCl}_3$ )

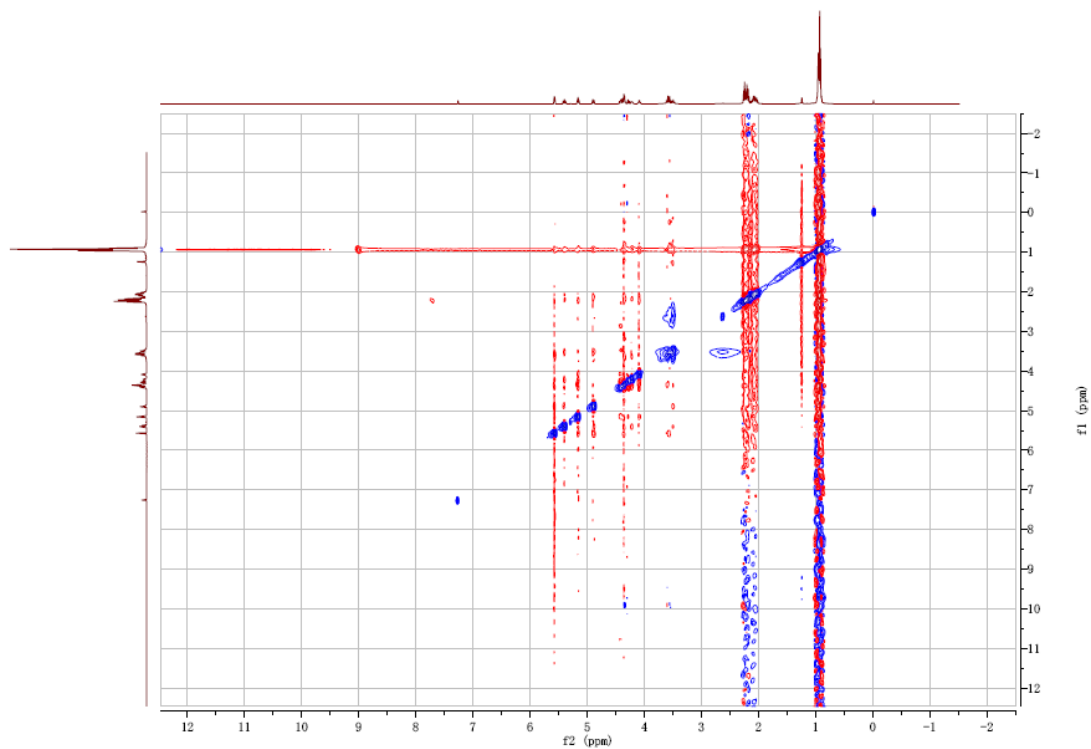

**Figure S41.** HRESIMS spectrum of compound **5**



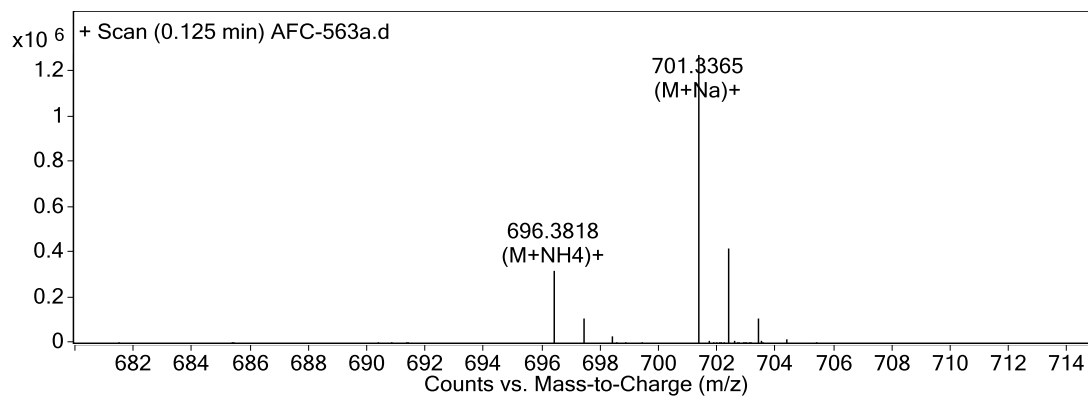

Figure S42. IR spectrum of compound 5

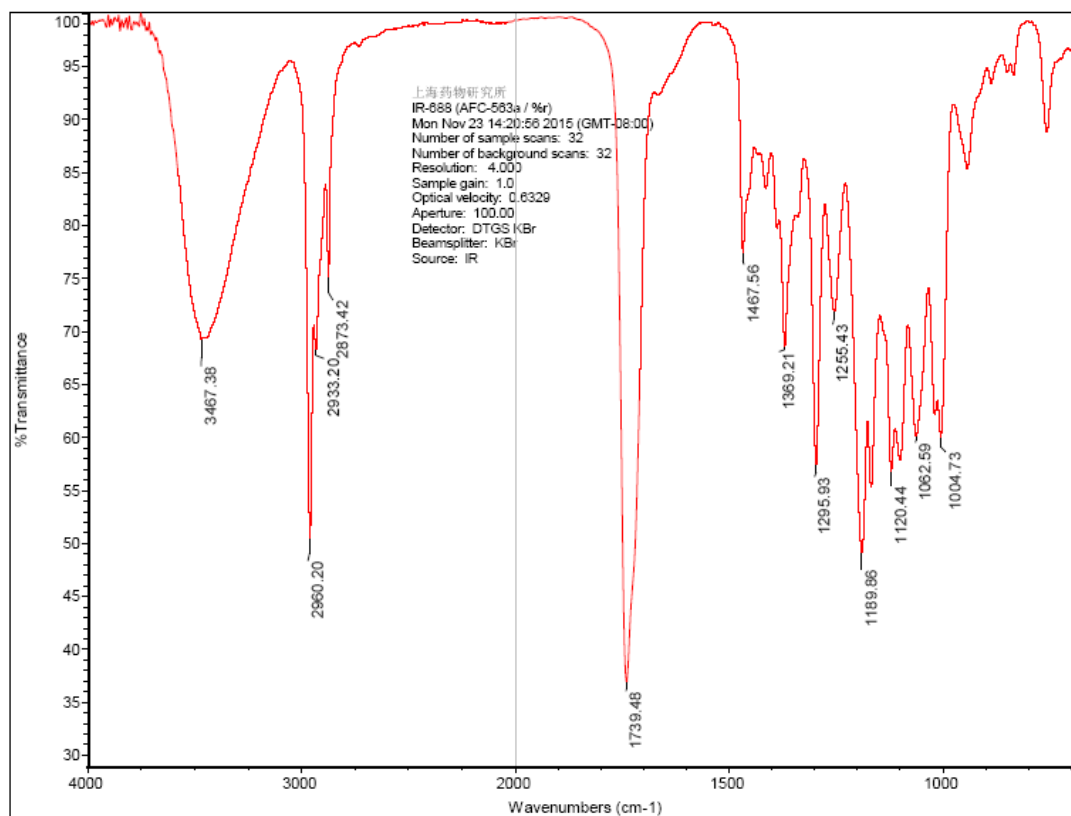

Figure S43. <sup>1</sup>H NMR spectrum of compound 5 (500 MHz, CDCl<sub>3</sub>)

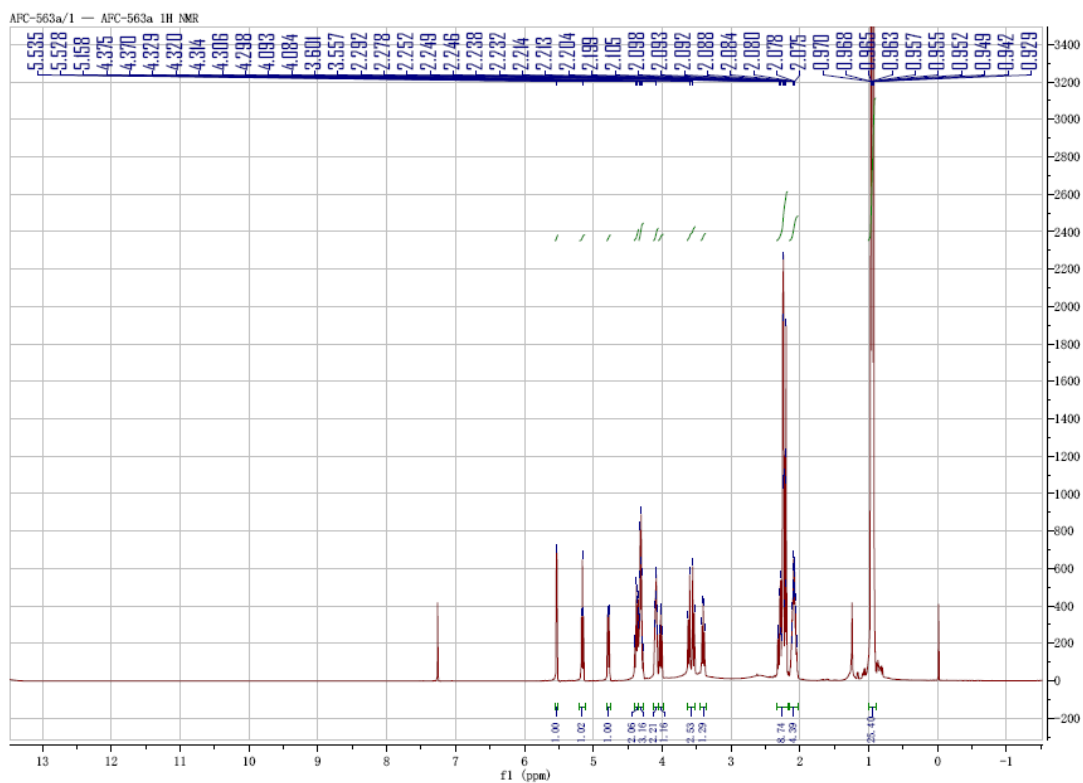

**Figure S44.**  $^{13}\text{C}$  NMR spectrum of compound **5** (125 MHz,  $\text{CDCl}_3$ )

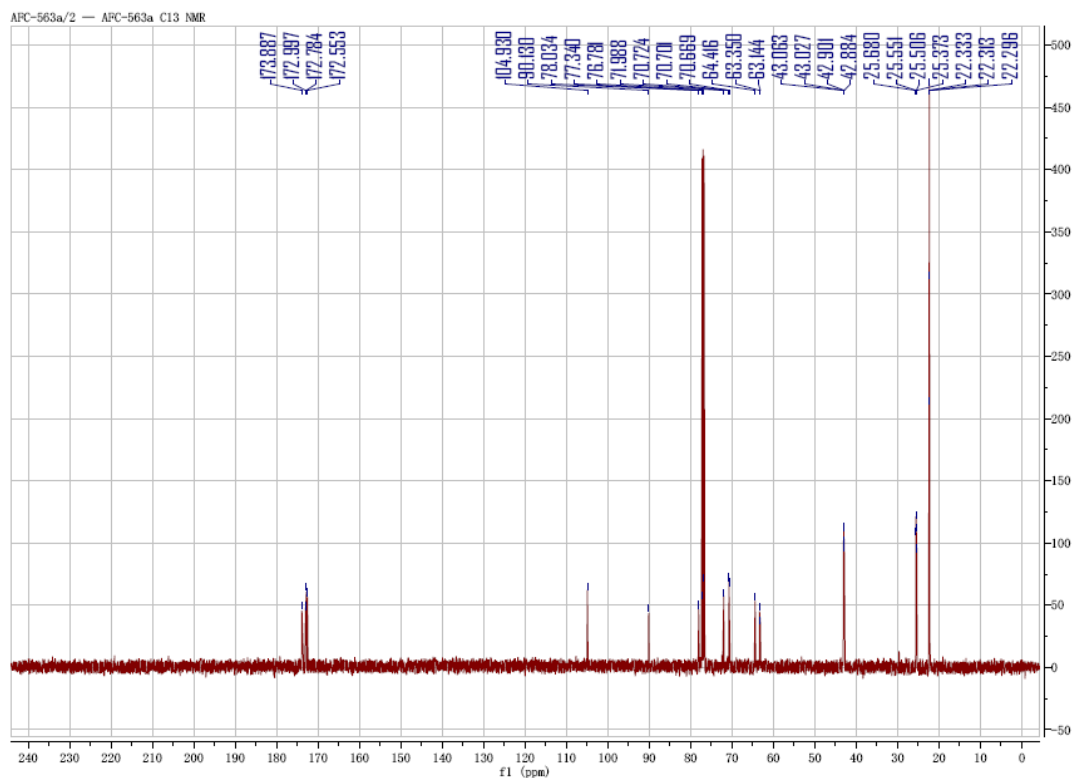

**Figure S45.** DEPT NMR spectrum of compound **5** (125 MHz,  $\text{CDCl}_3$ )

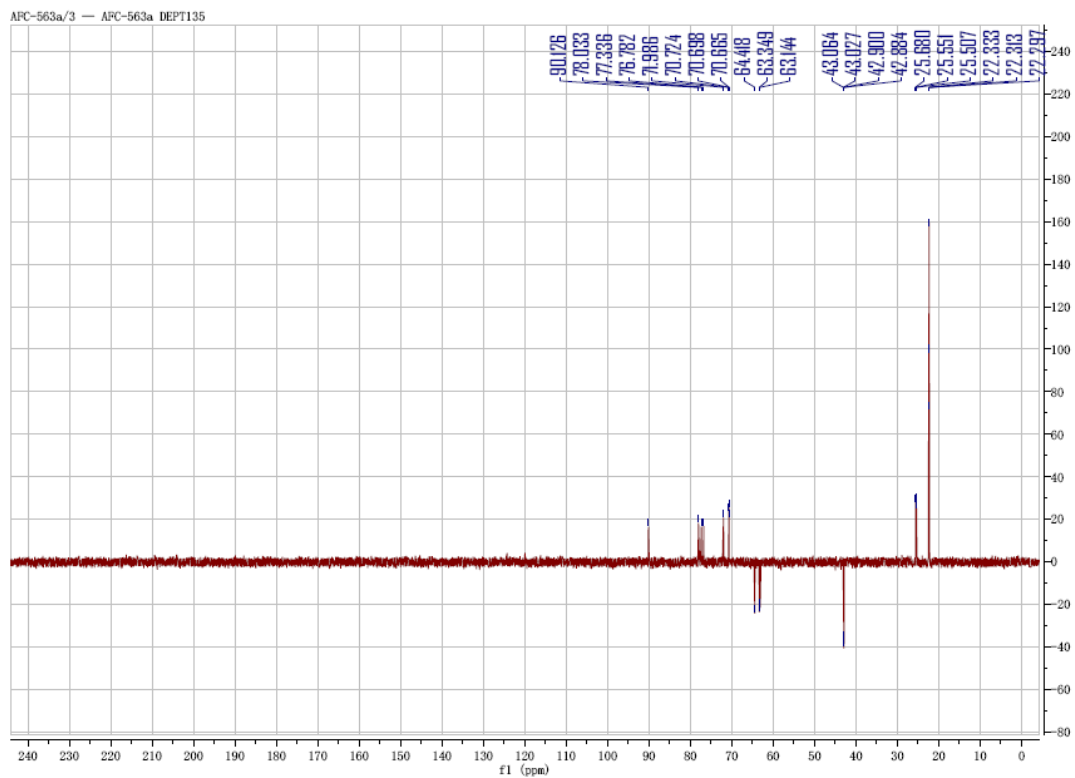

**Figure S46.**  $^1\text{H}$ - $^1\text{H}$  COSY NMR spectrum of compound **5** (500 MHz,  $\text{CDCl}_3$ )

AFC-563a/4 — AFC-563a 1H 1H COSY

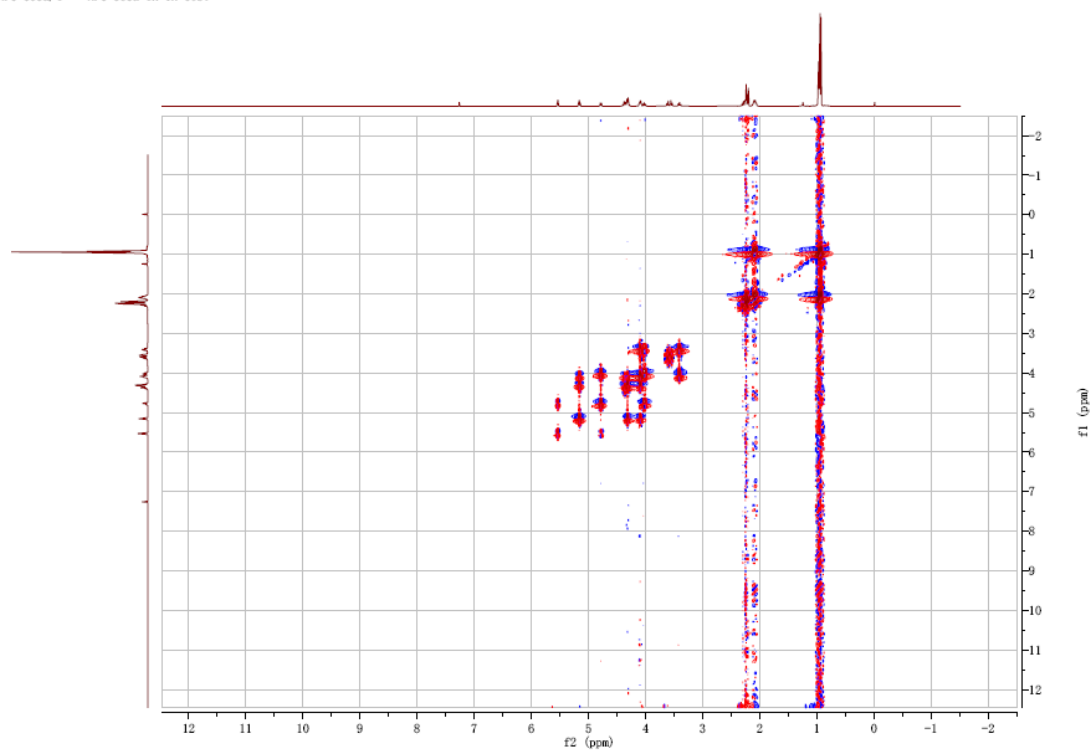

**Figure S47.** HSQC NMR spectrum of compound **5** (500 MHz,  $\text{CDCl}_3$ )

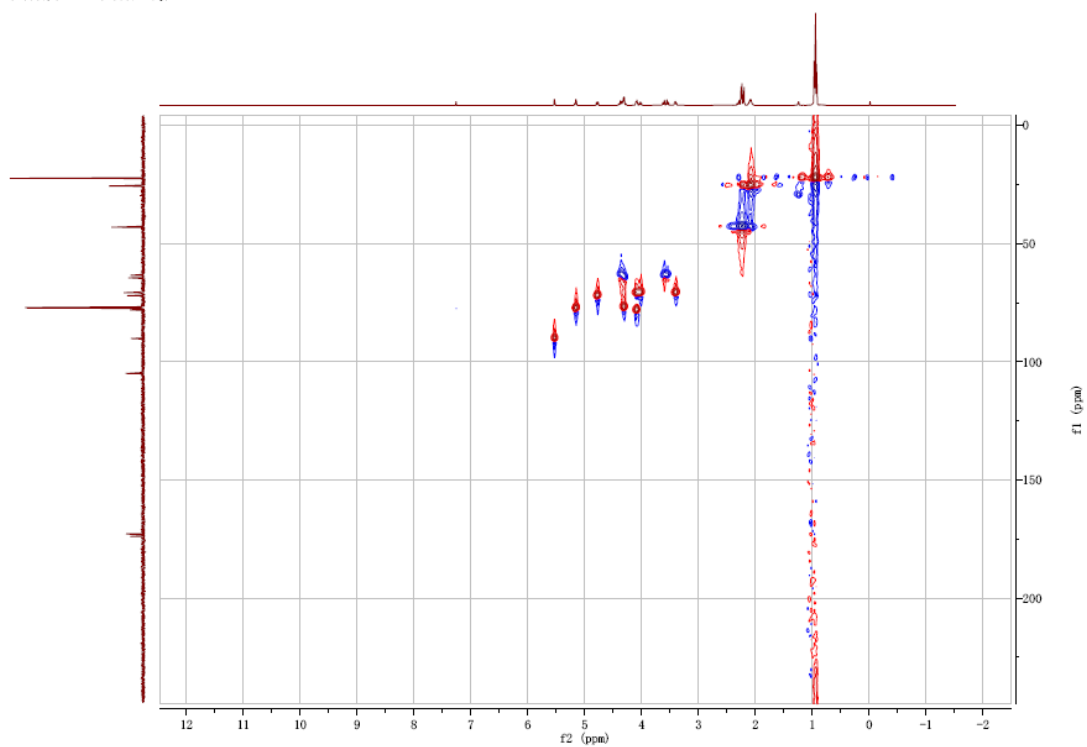

**Figure S48.** HMBC NMR spectrum of compound **5** (500 MHz, CDCl<sub>3</sub>)

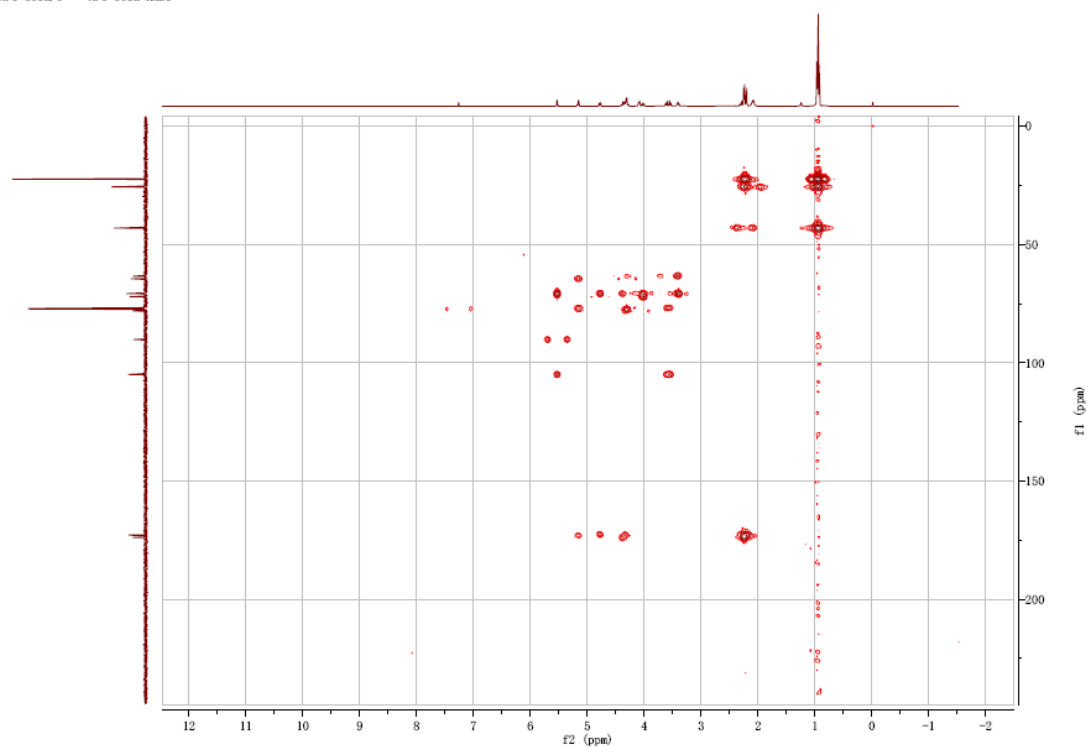

**Figure S49.** The magnified HMBC NMR spectrum of compound **5** (500 MHz, CDCl<sub>3</sub>)

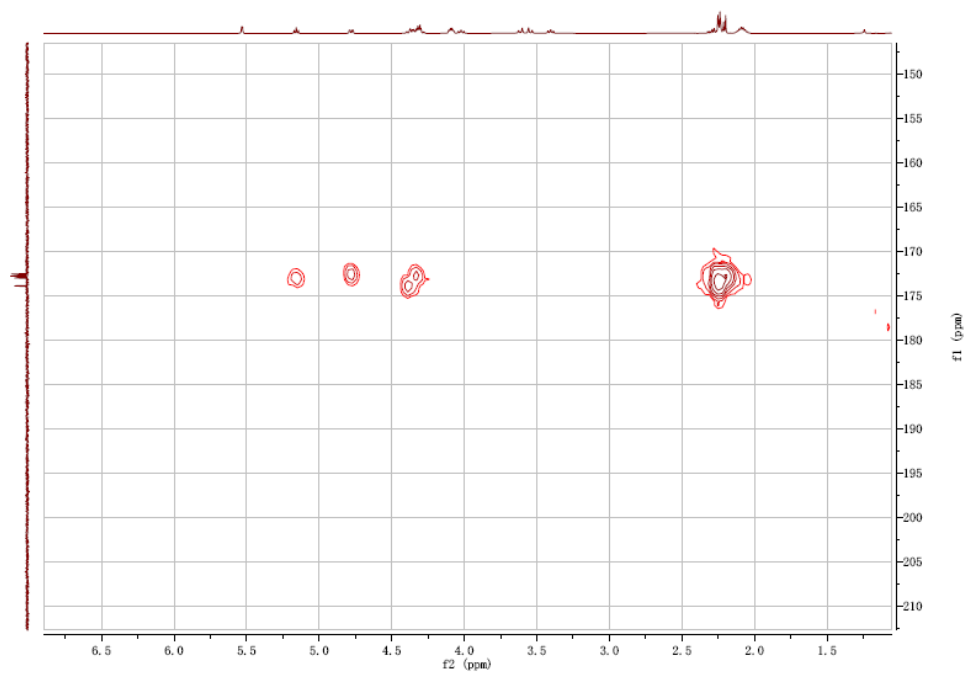

**Figure S50.** NOESY NMR spectrum of compound **5** (500 MHz, CDCl<sub>3</sub>)

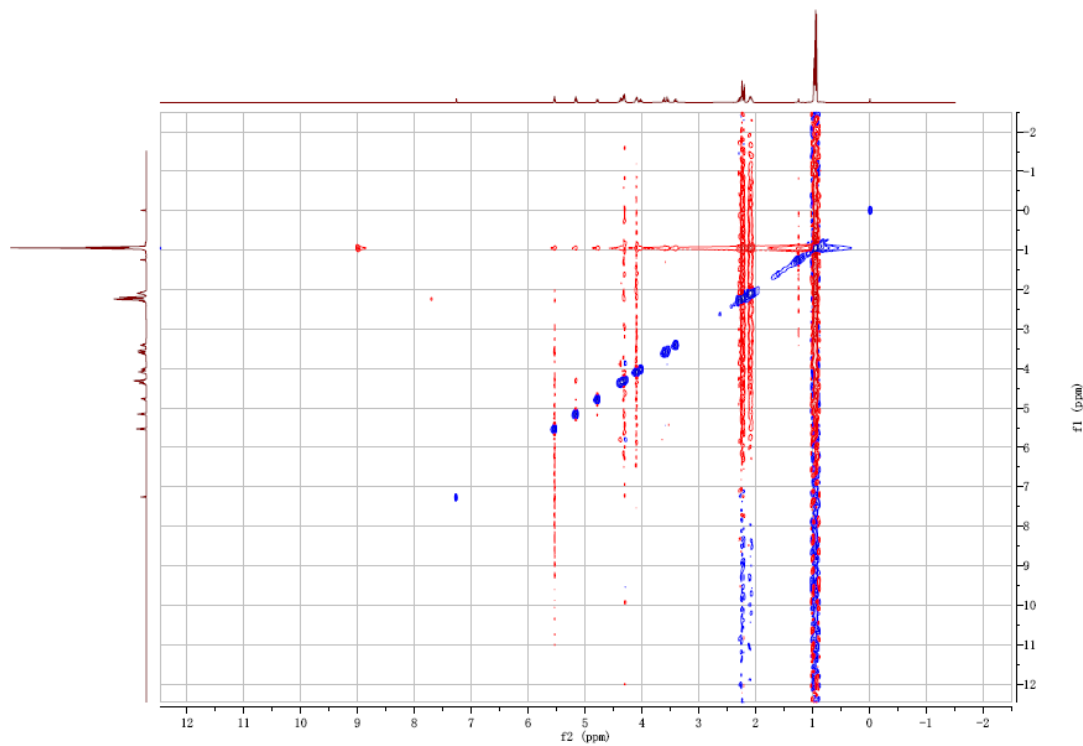

**Figure S51.** HRESIMS spectrum of compound **6**

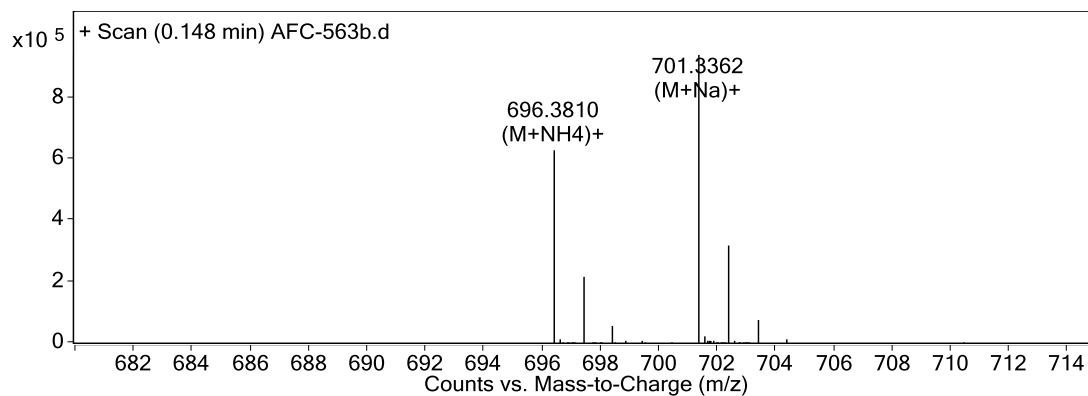

**Figure S52.** IR spectrum of compound **6**

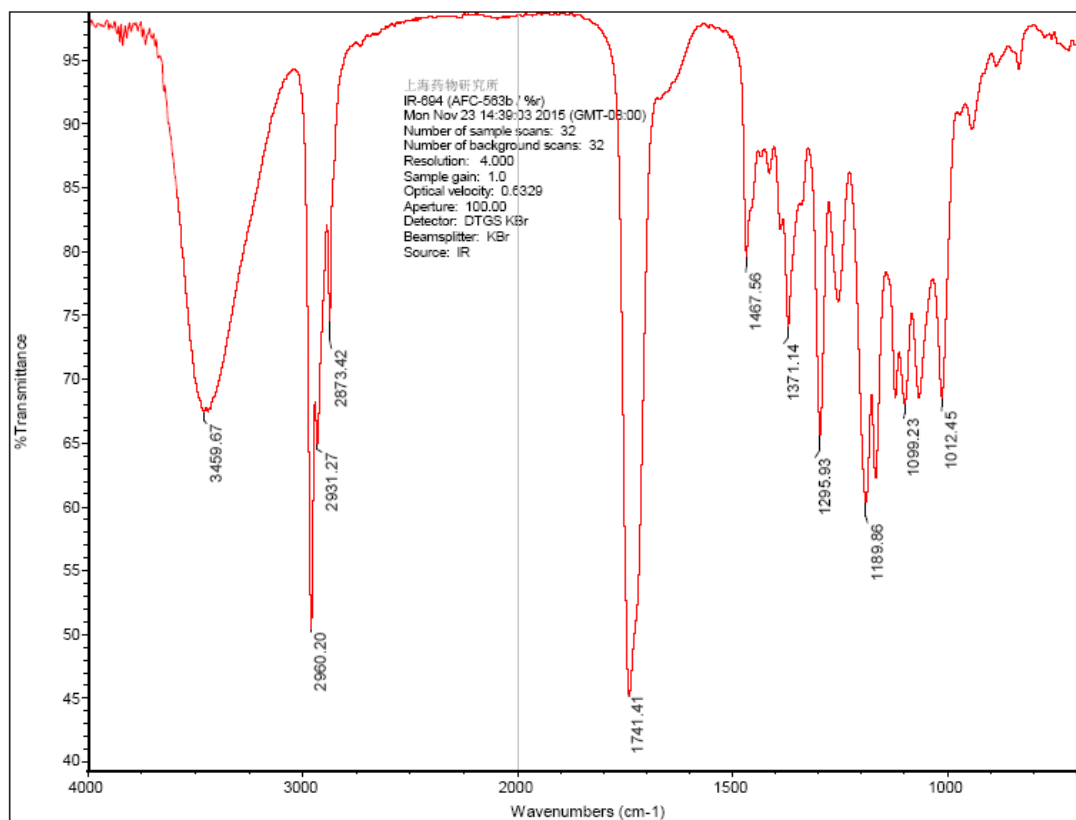

**Figure S53.** <sup>1</sup>H NMR spectrum of compound **6** (500 MHz, CDCl<sub>3</sub>)

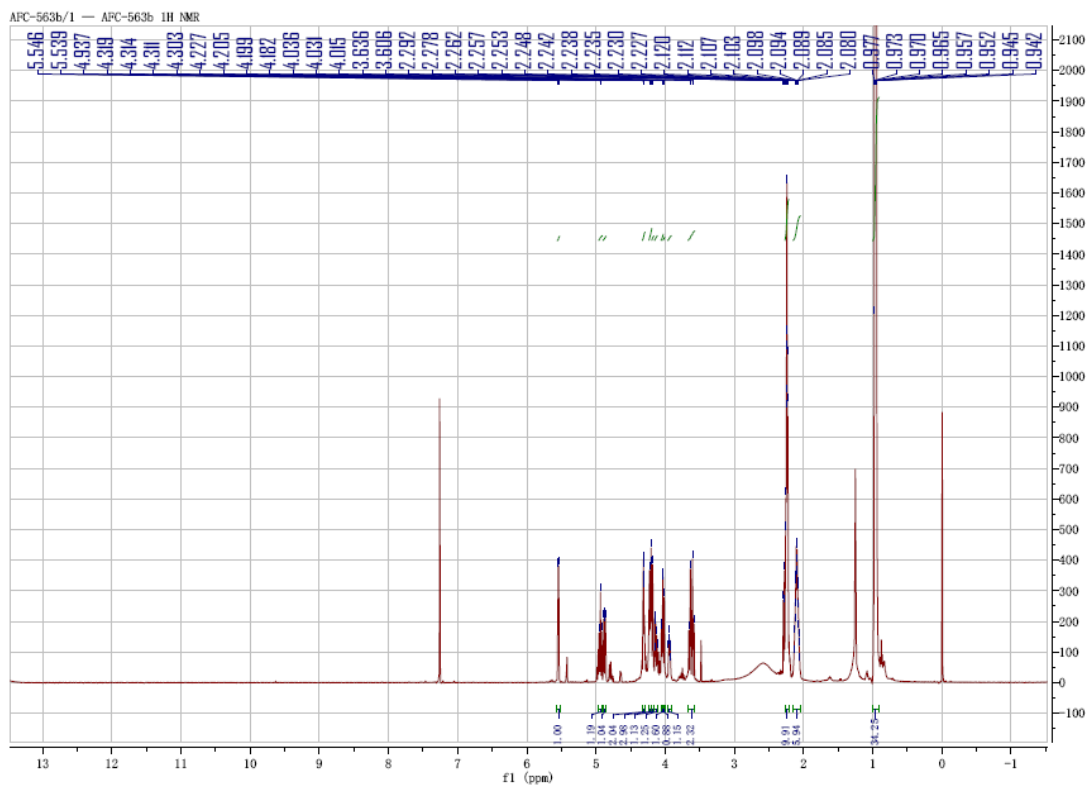

Figure S54.  $^{13}\text{C}$  NMR spectrum of compound **6** (125 MHz,  $\text{CDCl}_3$ )

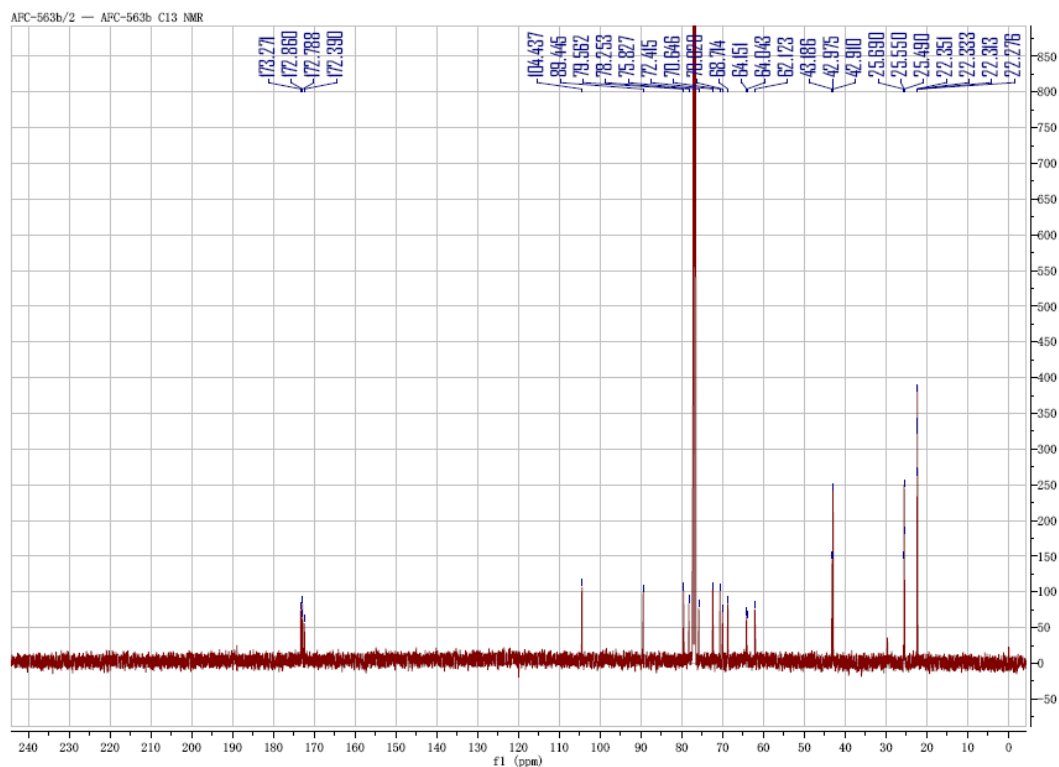

Figure S55. DEPT NMR spectrum of compound **6** (125 MHz,  $\text{CDCl}_3$ )

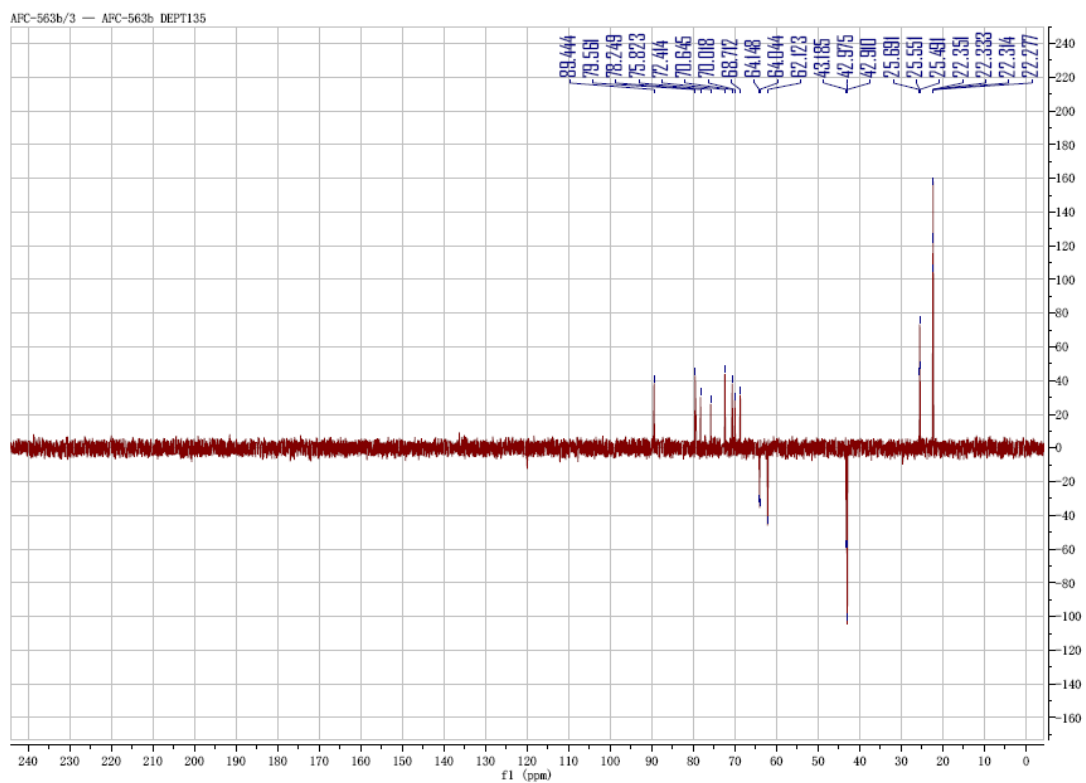

**Figure S56.**  $^1\text{H}$ - $^1\text{H}$  COSY NMR spectrum of compound **6** (500 MHz,  $\text{CDCl}_3$ )

APC-563b/4 — APC-563b 1H 1H COSY

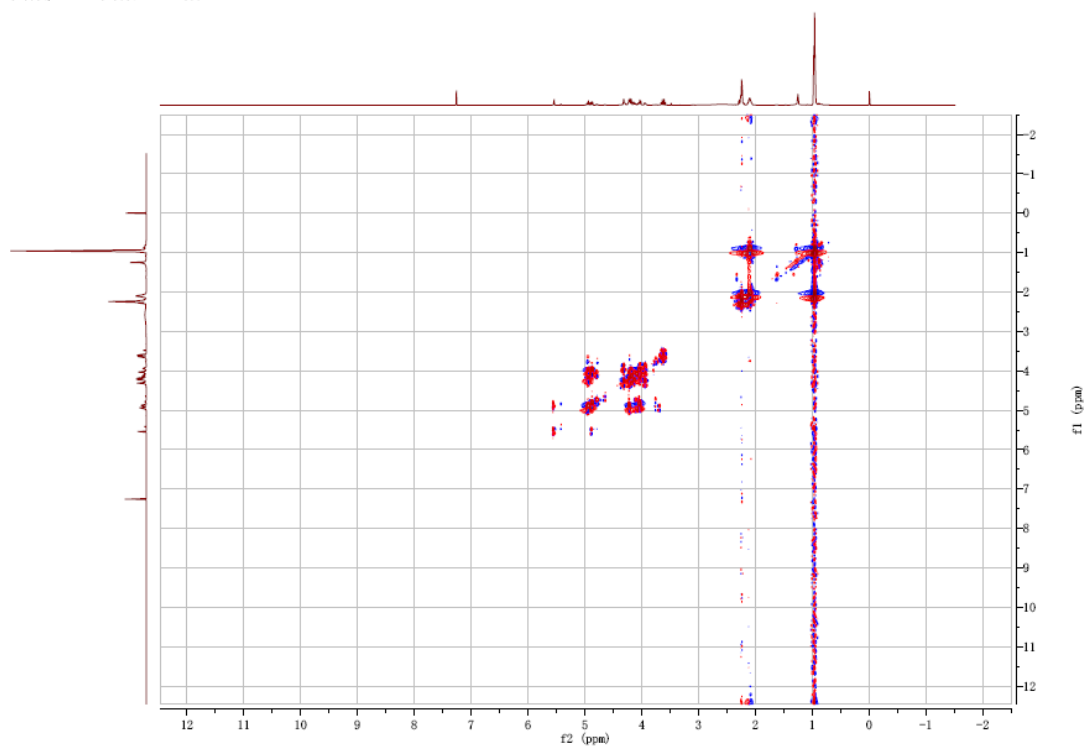

**Figure S57.** HSQC NMR spectrum of compound **6** (500 MHz,  $\text{CDCl}_3$ )



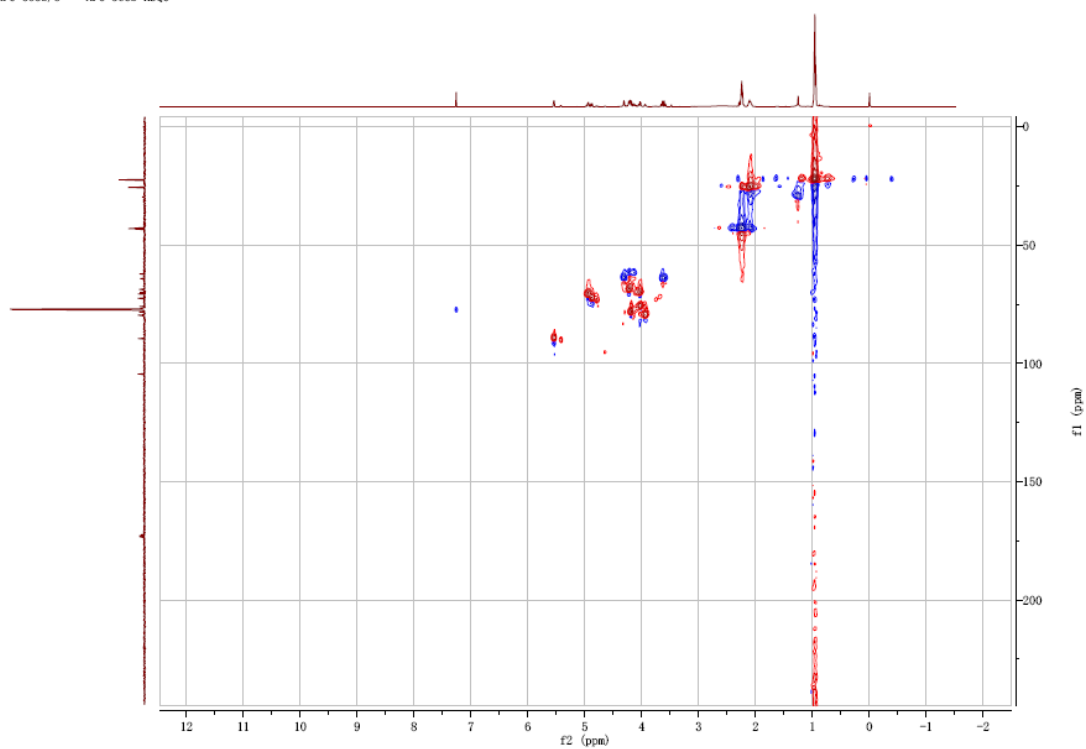

**Figure S58.** HMBC NMR spectrum of compound **6** (500 MHz, CDCl<sub>3</sub>)

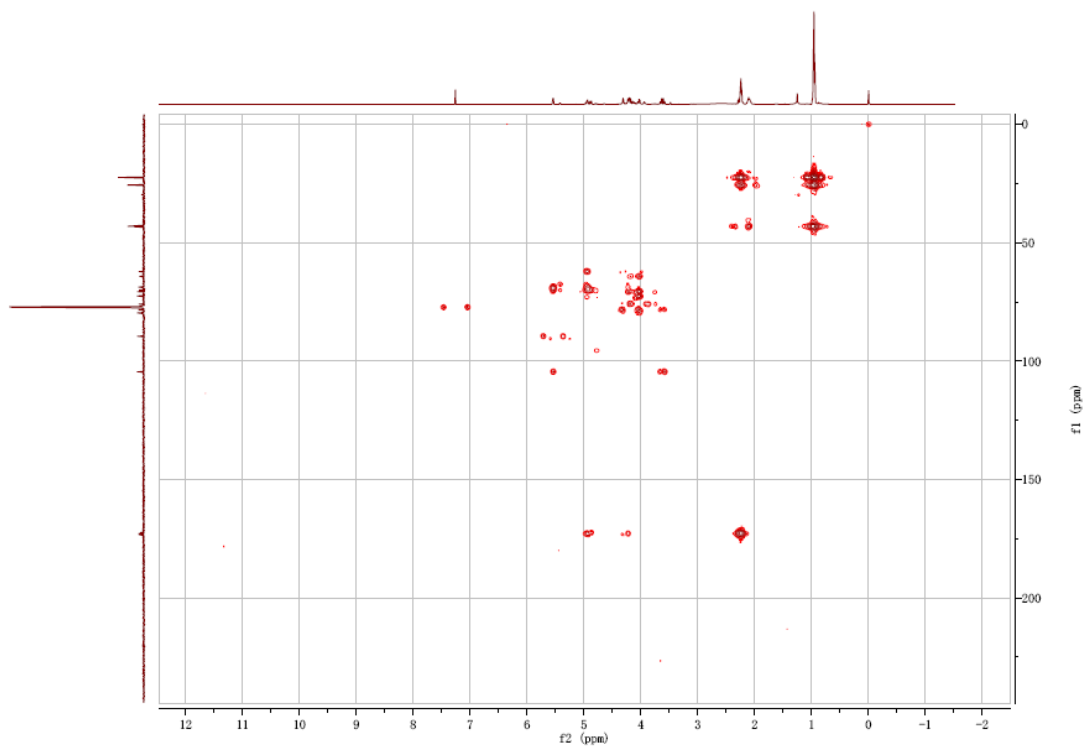

**Figure S59.** The magnified HMBC NMR spectrum of compound **6** (500 MHz, CDCl<sub>3</sub>)

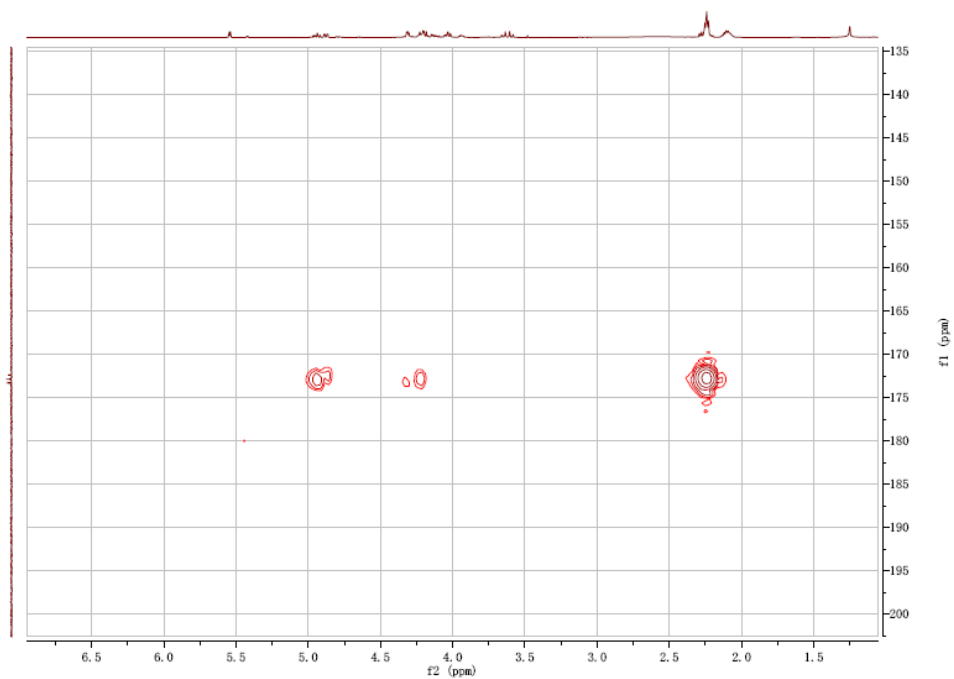

**Figure S60.** NOESY NMR spectrum of compound **6** (500 MHz, CDCl<sub>3</sub>)

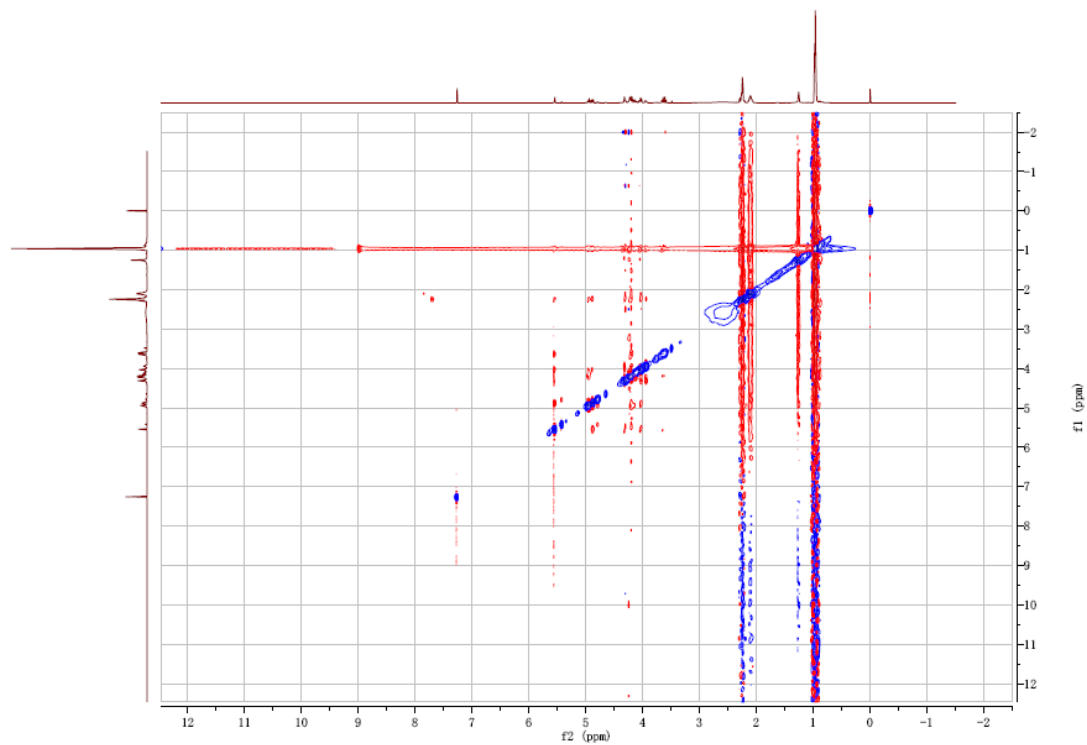

**Figure S61.** HRESIMS spectrum of compound **7**

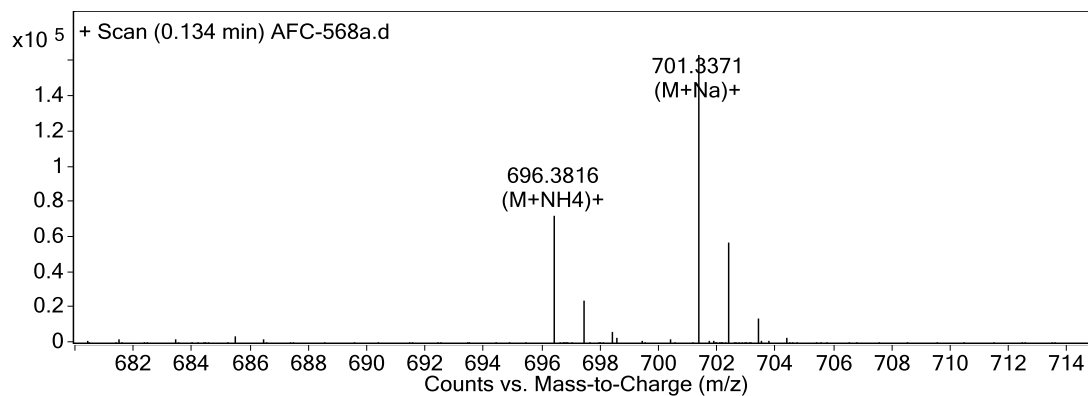

**Figure S62.** IR spectrum of compound 7

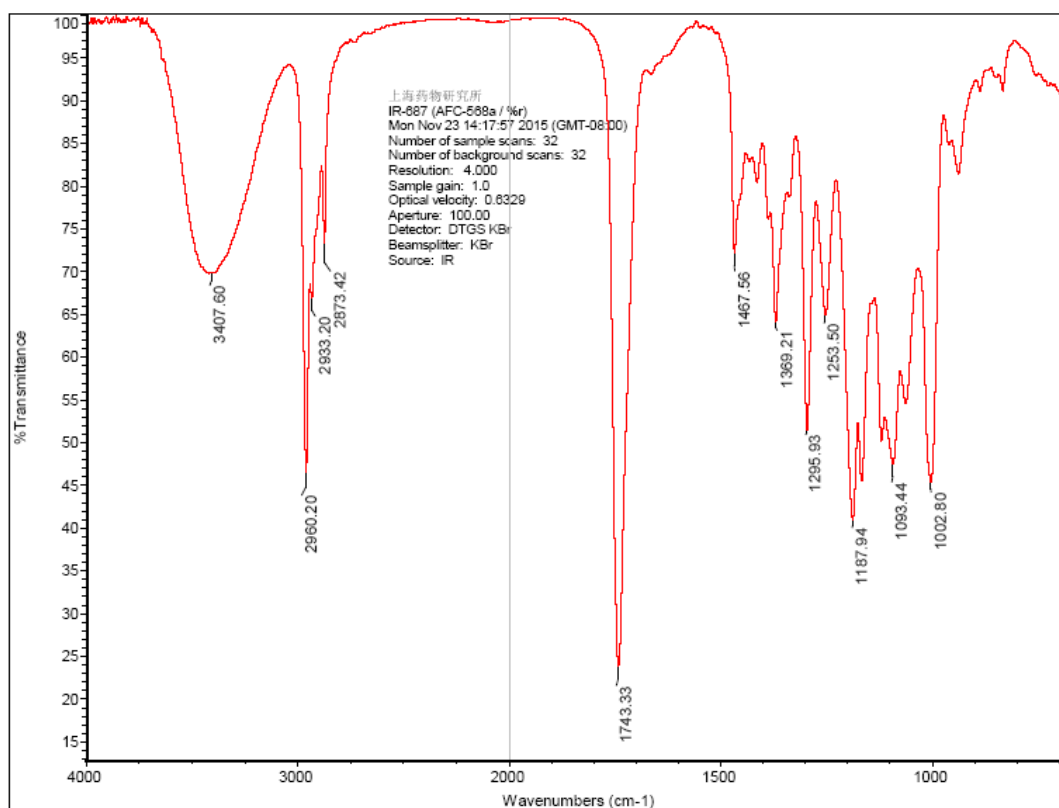

**Figure S63.** <sup>1</sup>H NMR spectrum of compound 7 (500 MHz, CDCl<sub>3</sub>)

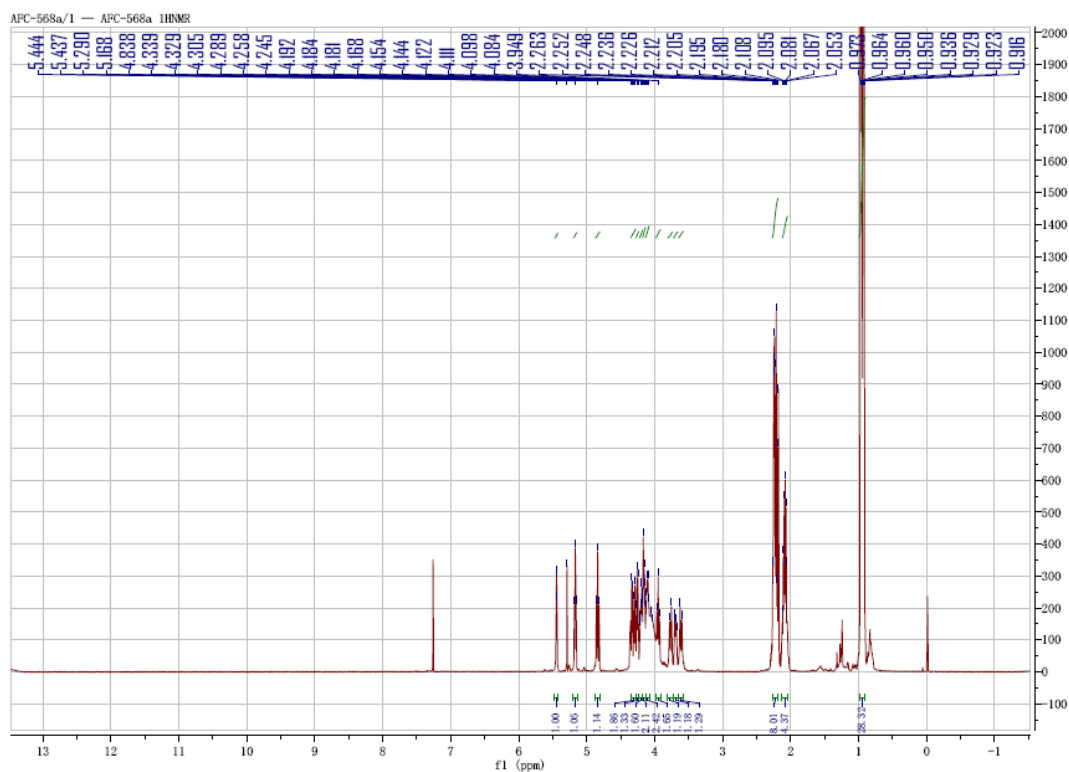

**Figure S64.**  $^{13}\text{C}$  NMR spectrum of compound **7** (125 MHz,  $\text{CDCl}_3$ )

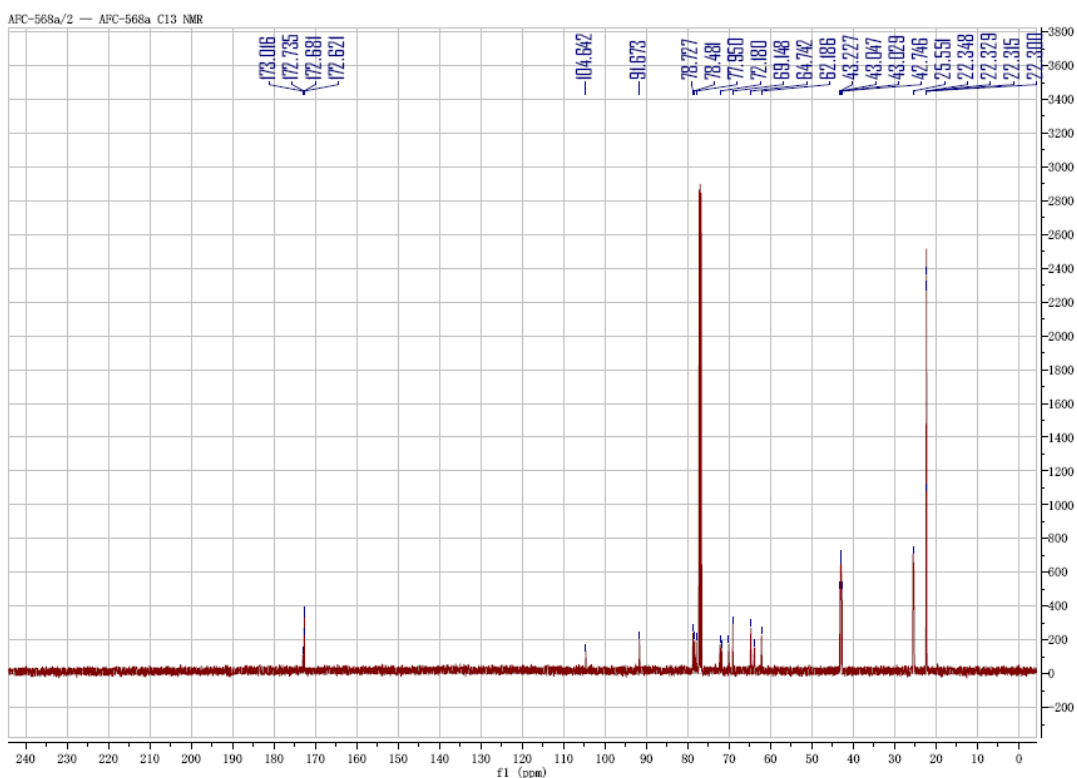

**Figure S65.** DEPT NMR spectrum of compound **7** (125 MHz,  $\text{CDCl}_3$ )

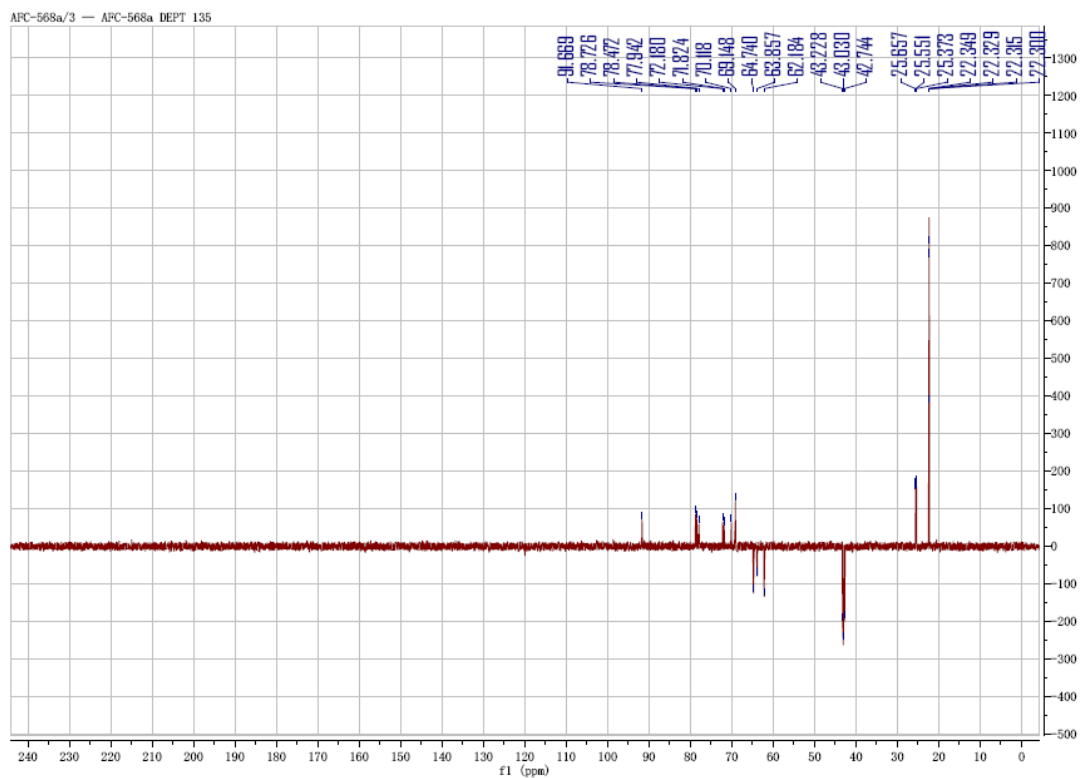

**Figure S66.**  $^1\text{H}$ - $^1\text{H}$  COSY NMR spectrum of compound **7** (500 MHz,  $\text{CDCl}_3$ )

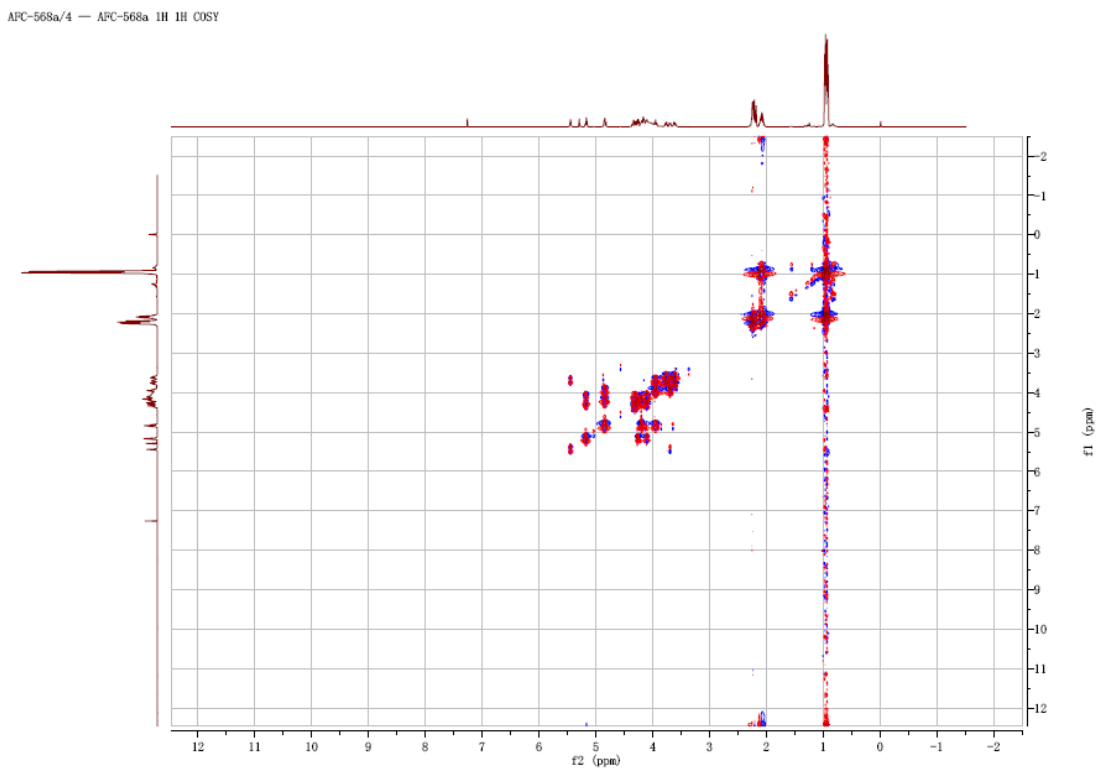

**Figure S67.** HSQC NMR spectrum of compound **7** (500 MHz,  $\text{CDCl}_3$ )

APC-568a/5 — APC-568a HSQC

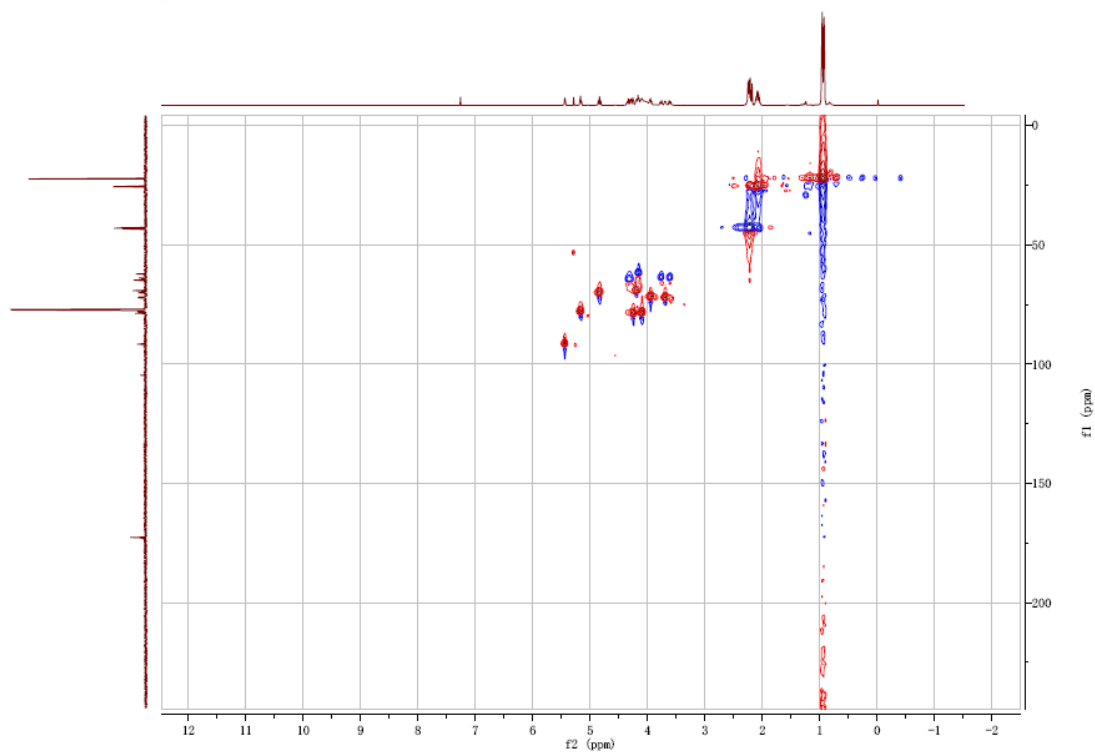

**Figure S68.** HMBC NMR spectrum of compound **7** (500 MHz, CDCl<sub>3</sub>)

APC-568a/6 — APC-568a HMBC

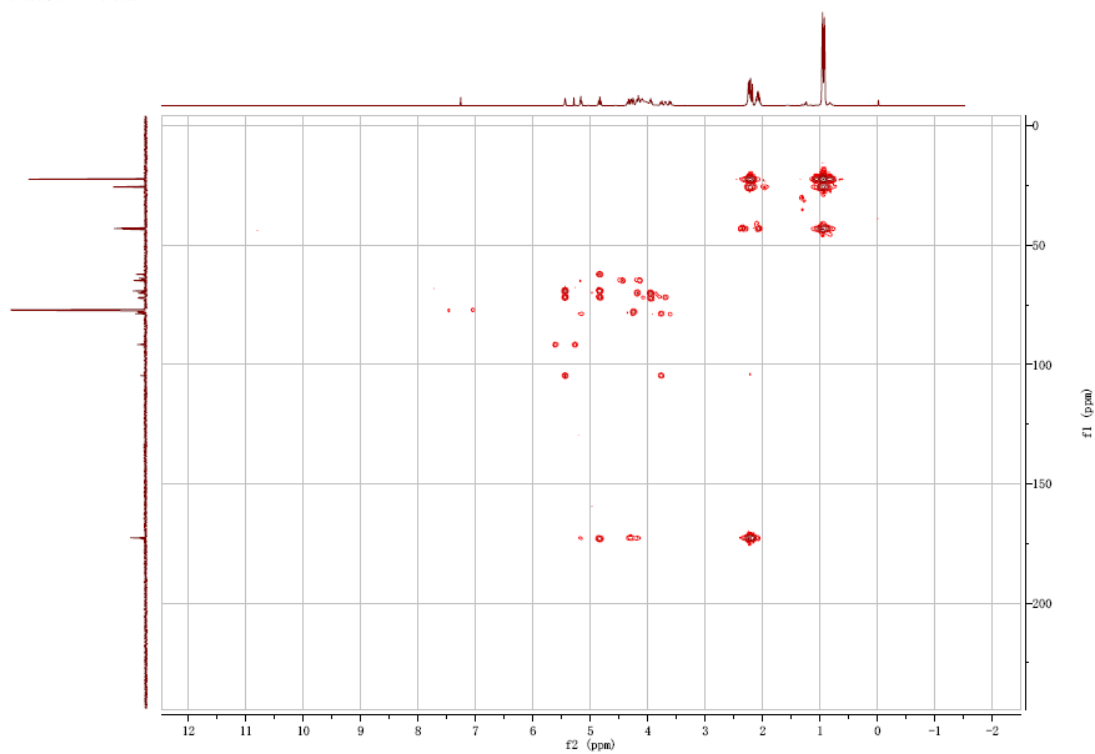

**Figure S69.** The magnified HMBC NMR spectrum of compound **7** (500 MHz, CDCl<sub>3</sub>)

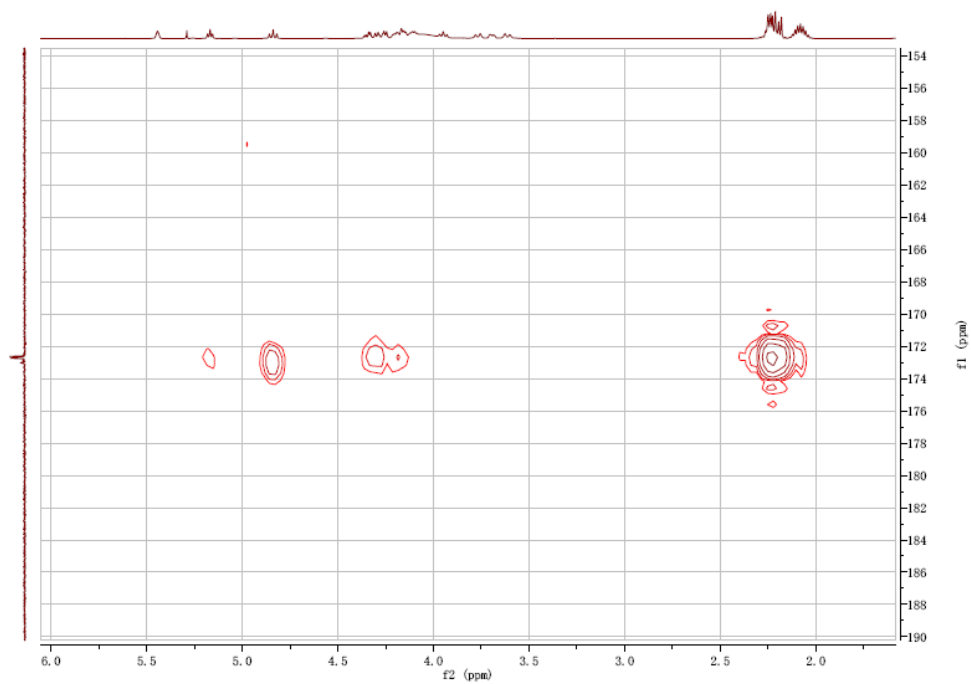

**Figure S70.** NOESY NMR spectrum of compound **7** (500 MHz, CDCl<sub>3</sub>)

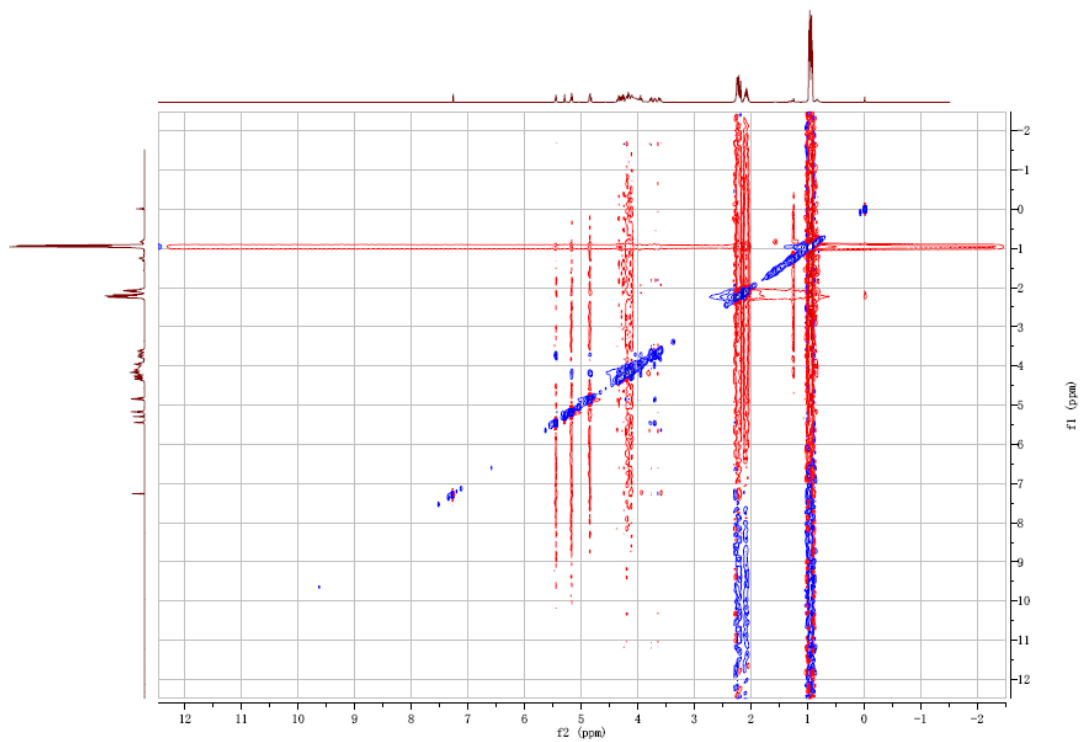

**Figure S71.** HRESIMS spectrum of compound **8**

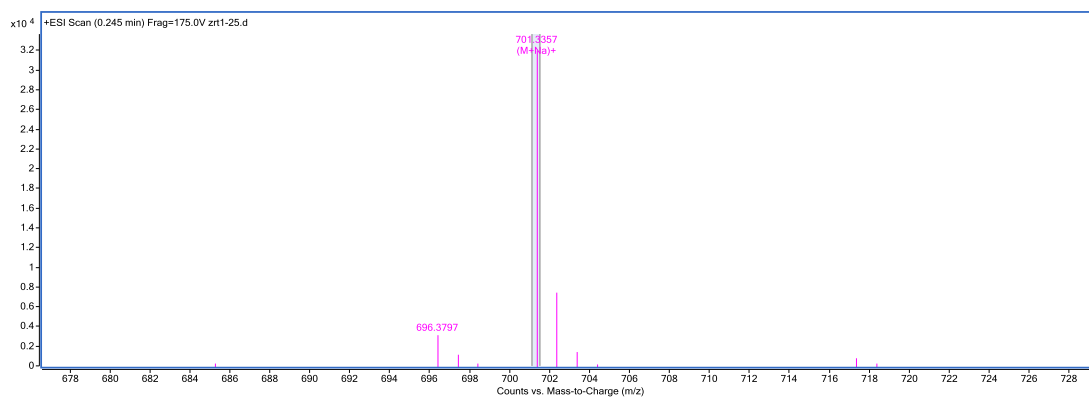

**Figure S72.** IR spectrum of compound **8**

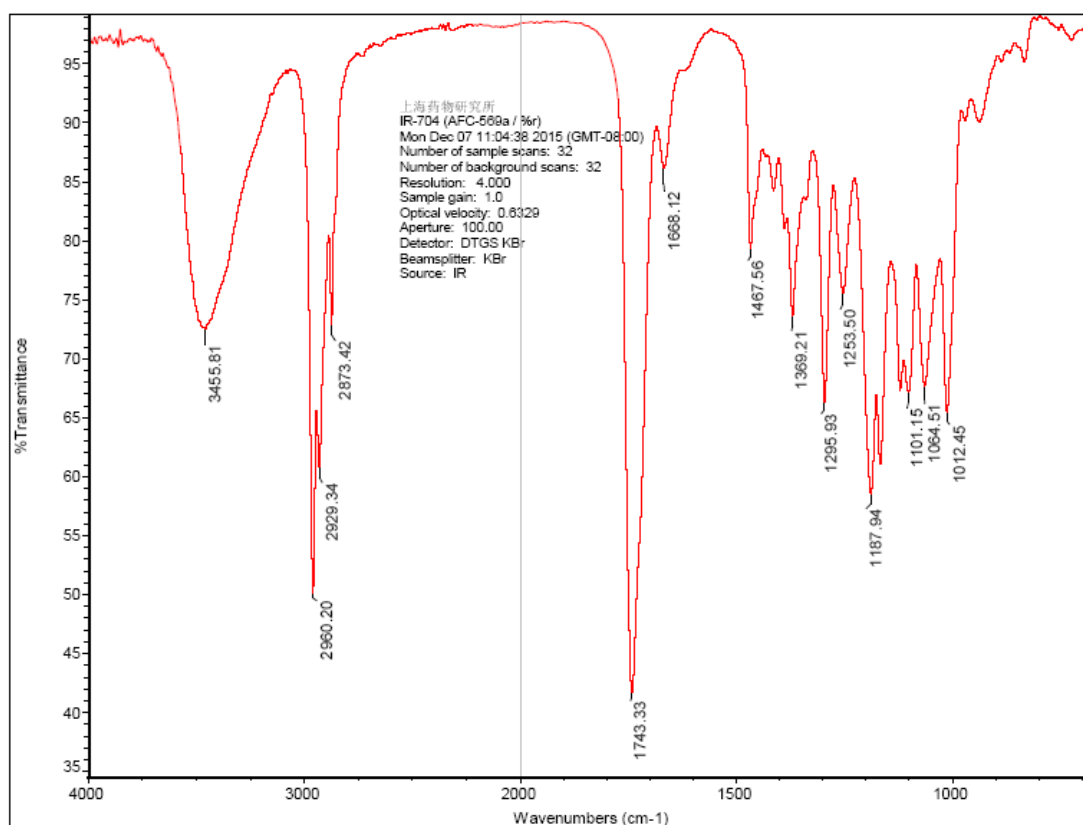

**Figure S73.** <sup>1</sup>H NMR spectrum of compound **8** (500 MHz, CDCl<sub>3</sub>)



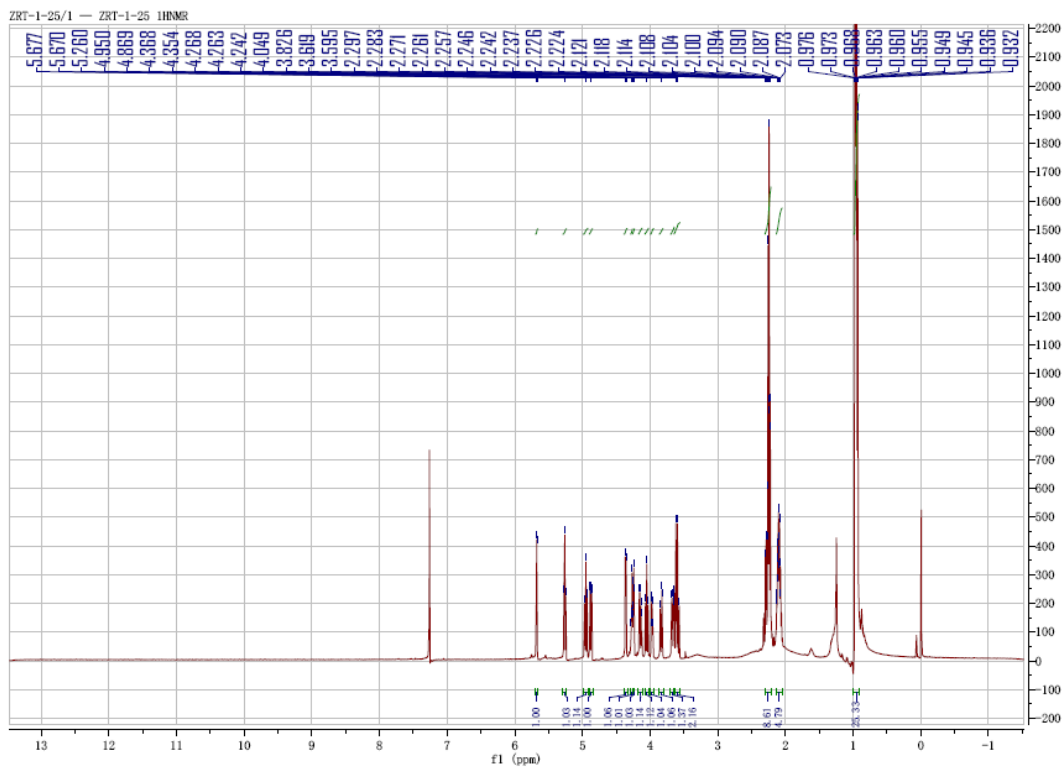

**Figure S74.**  $^{13}\text{C}$  NMR spectrum of compound **8** (125 MHz,  $\text{CDCl}_3$ )

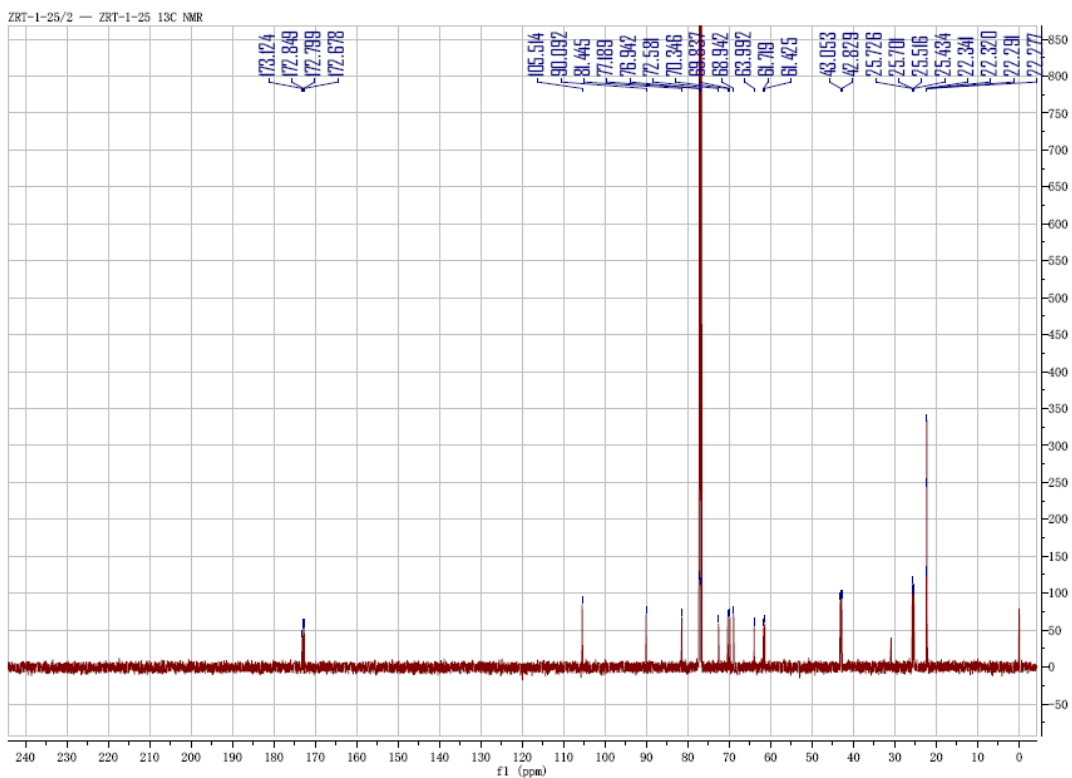

**Figure S75.** DEPT NMR spectrum of compound **8** (125 MHz,  $\text{CDCl}_3$ )

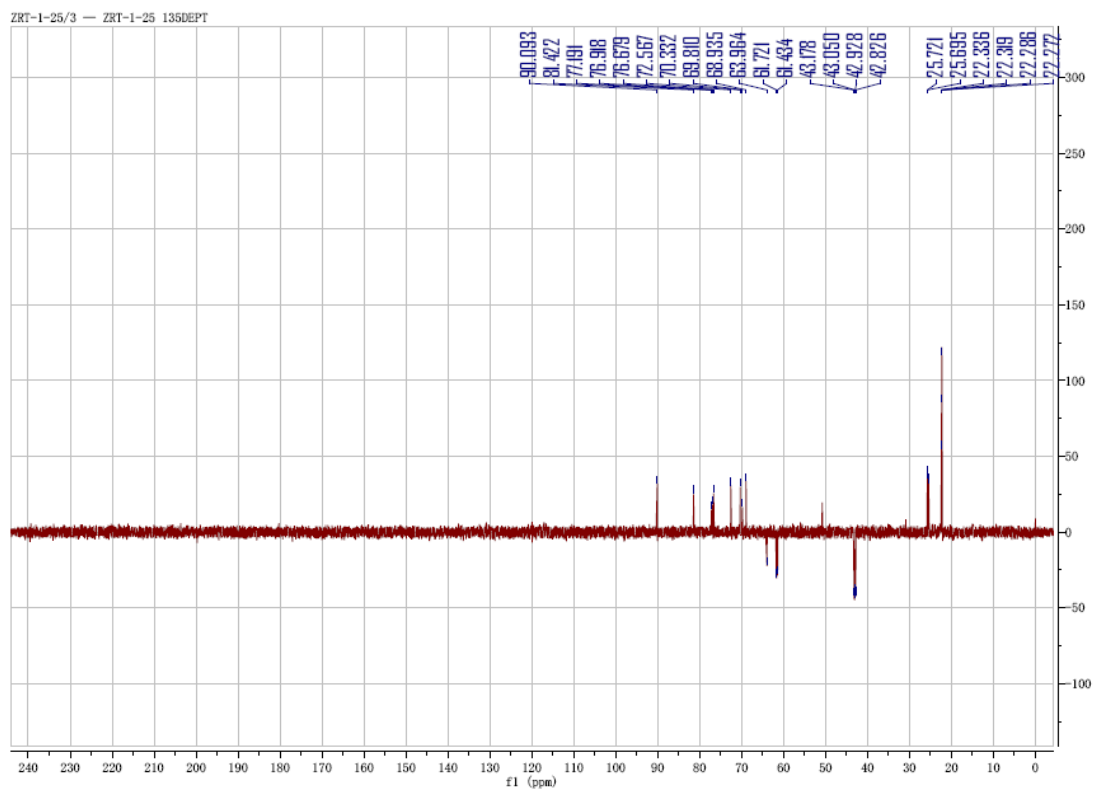

**Figure S76.**  $^1\text{H}$ - $^1\text{H}$  COSY NMR spectrum of compound **8** (500 MHz,  $\text{CDCl}_3$ )

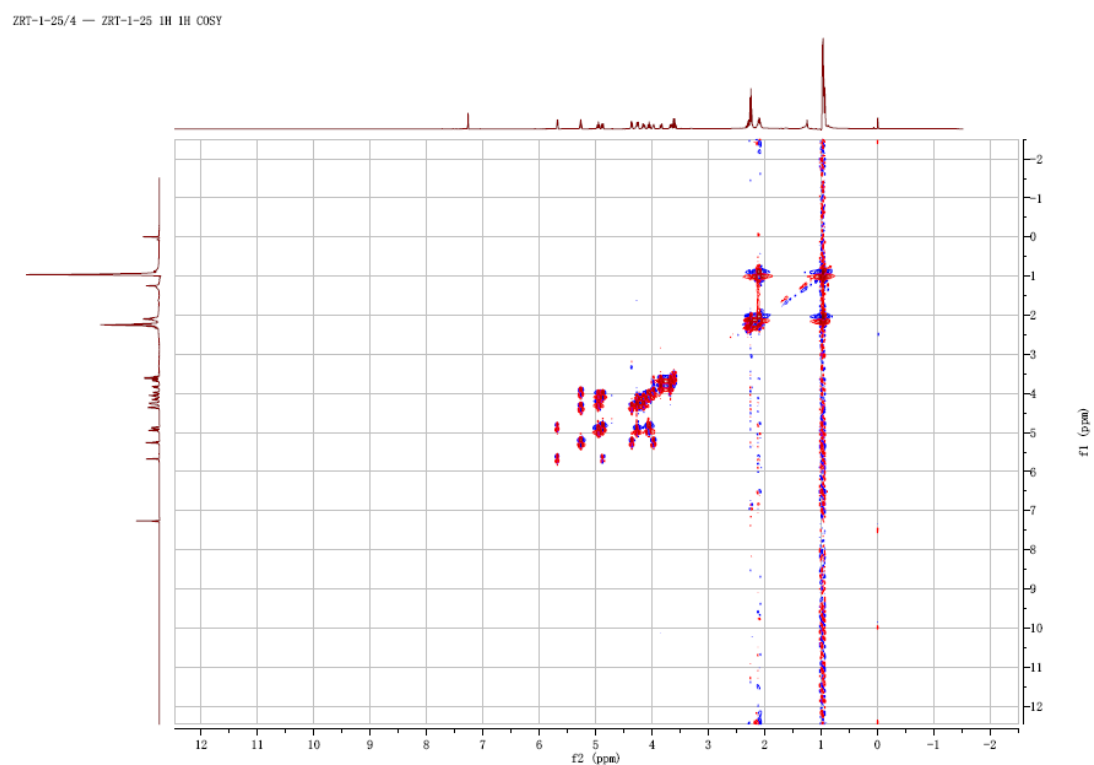

**Figure S77.** HSQC NMR spectrum of compound **8** (500 MHz,  $\text{CDCl}_3$ )

ZRT-1-25/5 — ZRT-1-25 HSQC

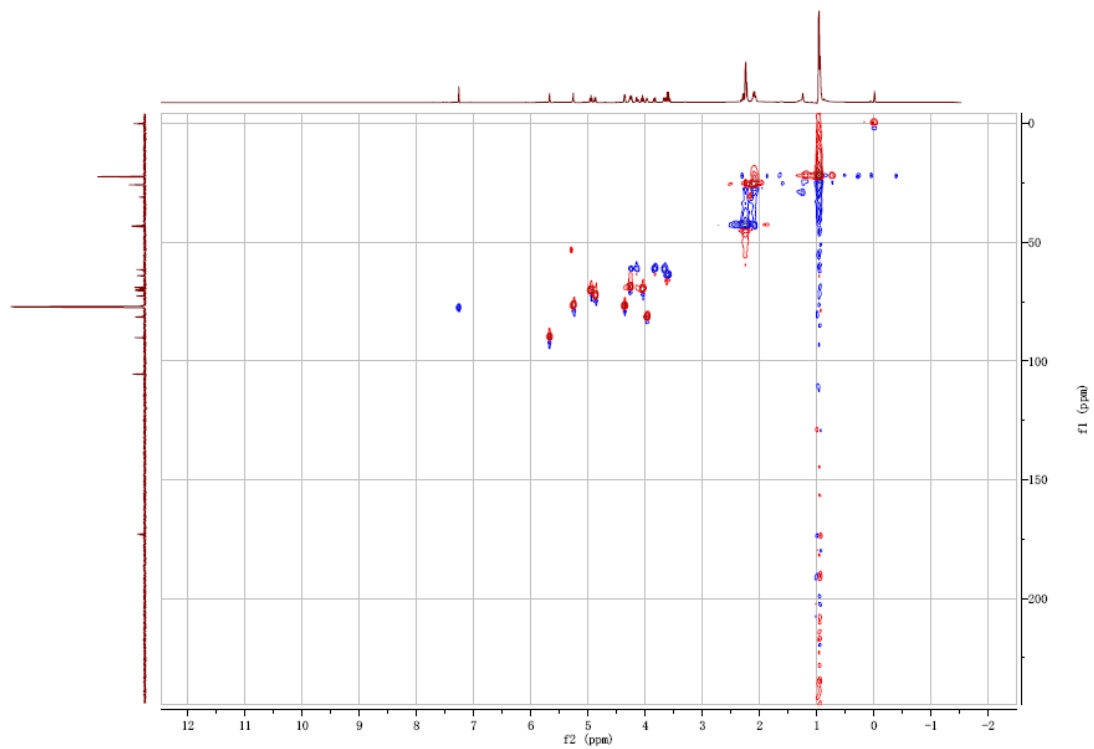

**Figure S78.** HMBC NMR spectrum of compound **8** (500 MHz, CDCl<sub>3</sub>)

ZRT-1-25/6 — ZRT-1-25 HMBC

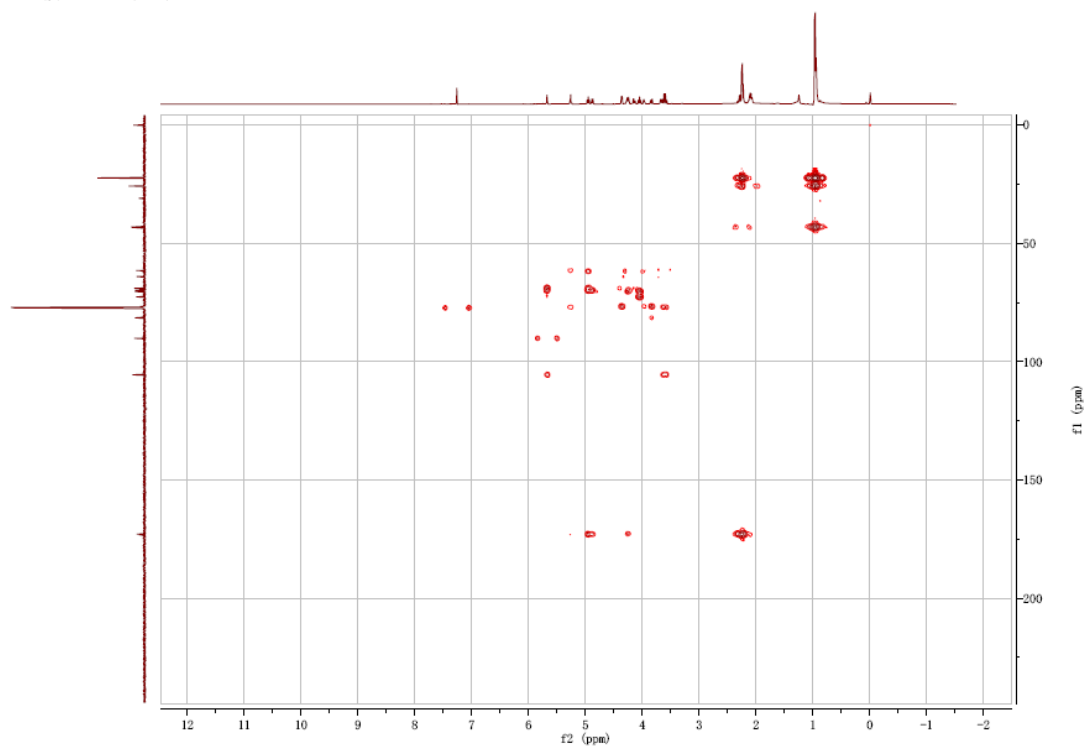

**Figure S79.** The magnified HMBC NMR spectrum of compound **8** (500 MHz, CDCl<sub>3</sub>)

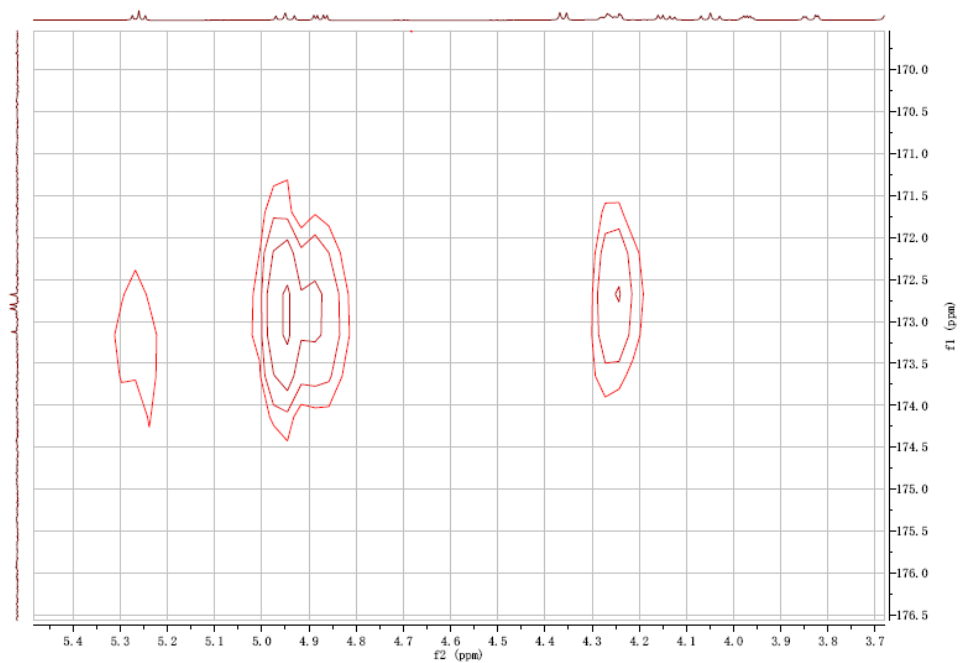

**Figure S80.** NOESY NMR spectrum of compound **8** (500 MHz,  $\text{CDCl}_3$ )

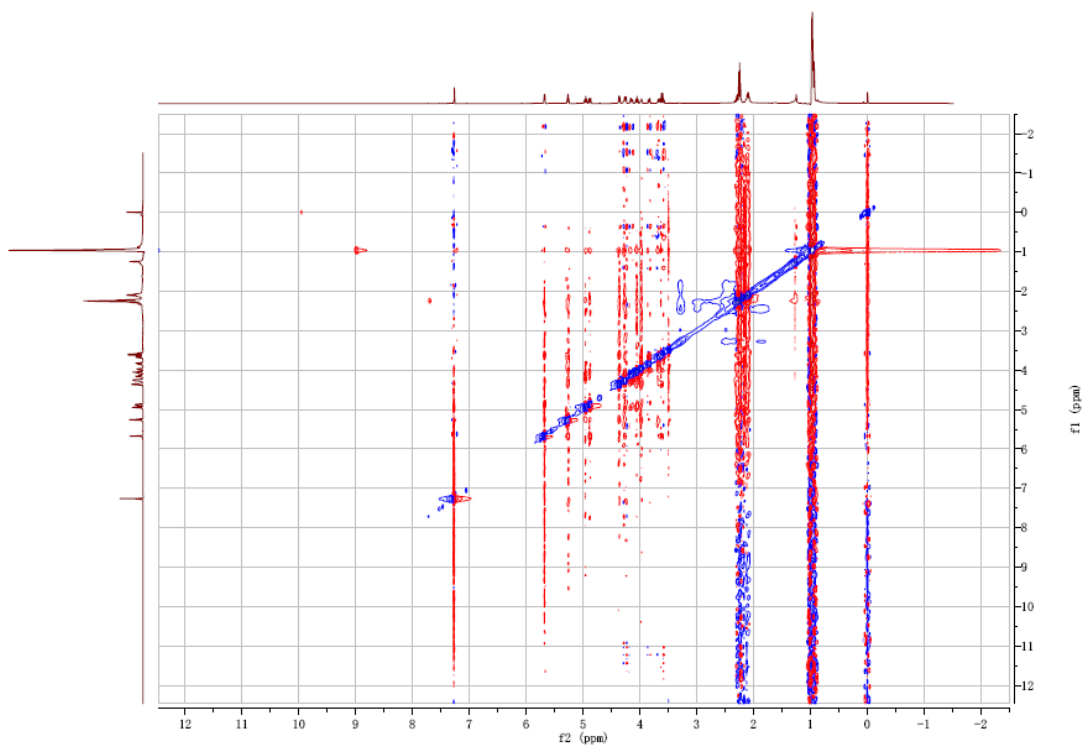

**Figure S81.**  $^1\text{H}$  NMR spectrum of Isovaleric acid (500 MHz,  $\text{CDCl}_3$ )

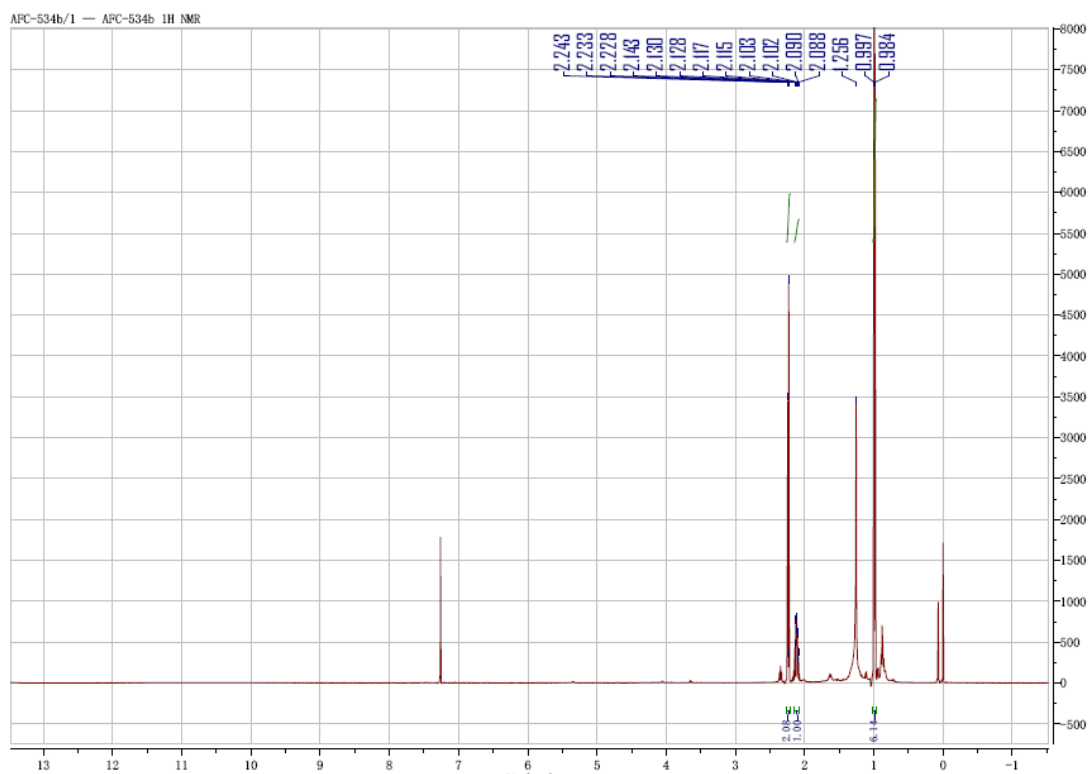

**Figure S82.**  $^1\text{H}$  NMR spectrum of Isovaleric acid (125 MHz,  $\text{CDCl}_3$ )

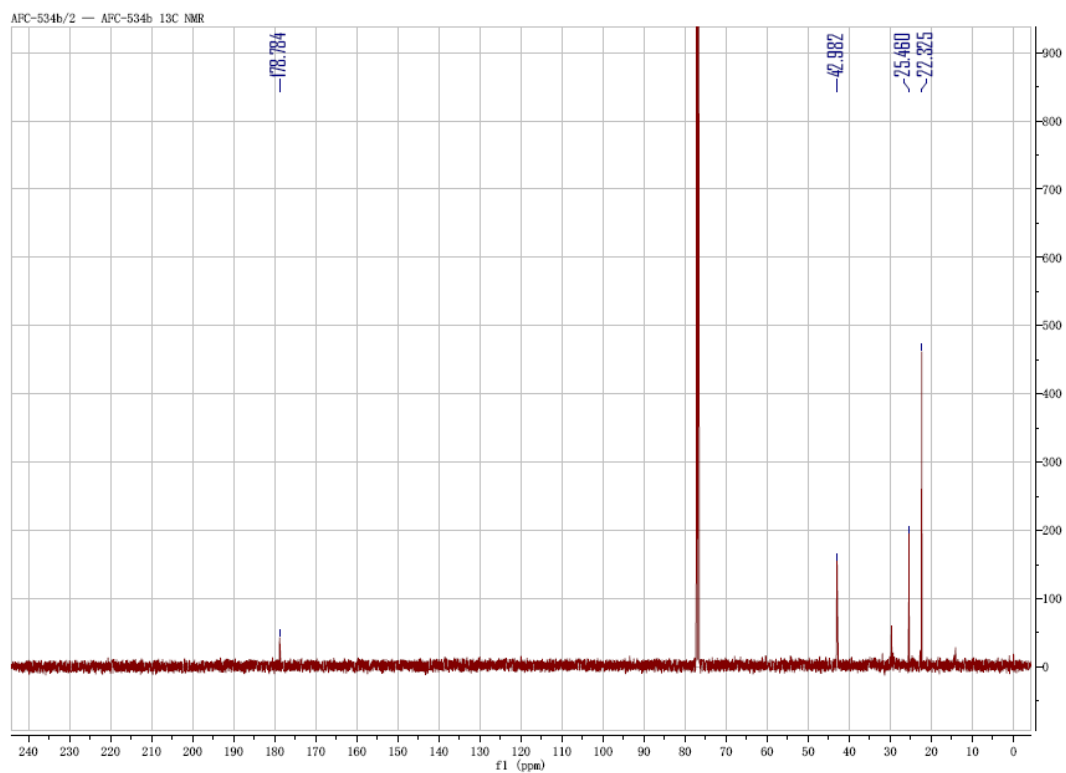

**Figure S83.** DEPT NMR spectrum of Isovaleric acid (125 MHz,  $\text{CDCl}_3$ )

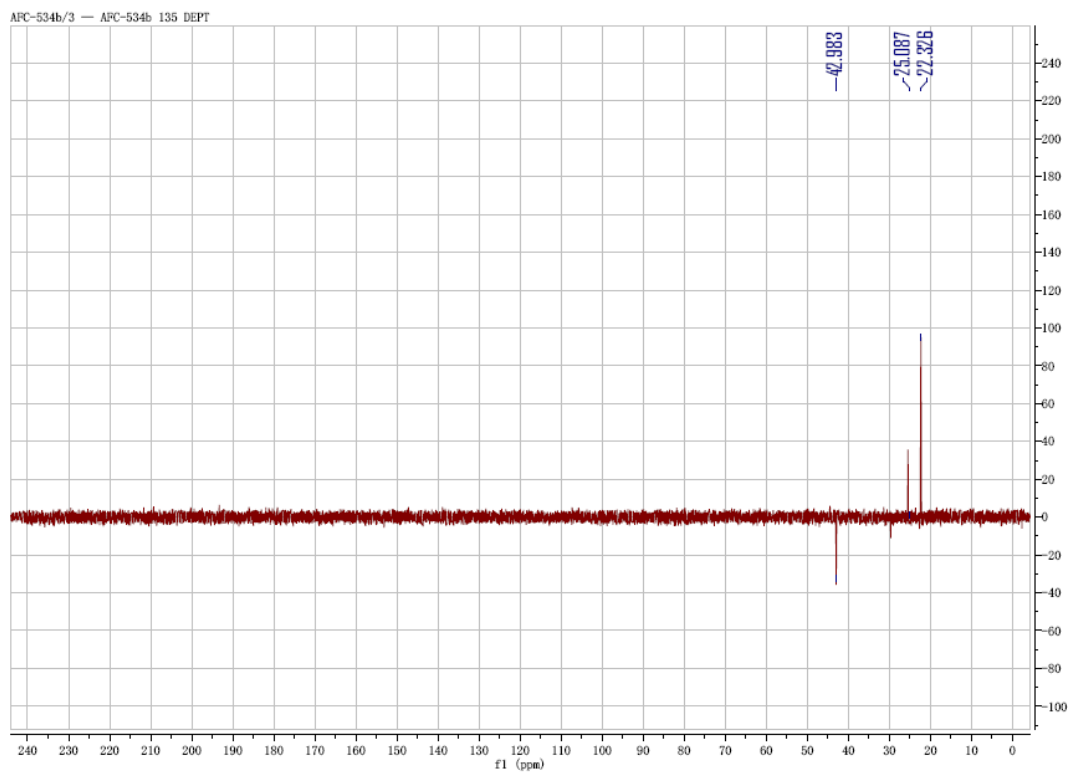

**Figure S84.** Viability of A549 cells after exposure to 0.1% DMSO or various concentrations of compound 2 for 24, 48, and 72 h.

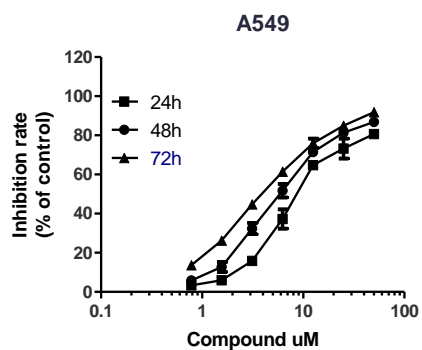

The data are expressed as the means  $\pm$  SEM of three independent experiments.
